# Supplementary material for: Prospective pilot study protocol evaluating the safety and feasibility of robot-assisted nipple-sparing mastectomy (RNSM)
Source: PubMed Central journal article supplement — BMJ Open. 2021 Nov 15;11(11):e050173. doi: 10.1136/bmjopen-2021-050173 (PMC8593753; doi:10.1136/bmjopen-2021-050173), 2021-11-15
Supplement: bmjopen-2021-050173.draft_revisions.pdf [file bmjopen-2021-050173.draft_revisions.pdf]

# BMJ Open

BMJ Open is committed to open peer review. As part of this commitment we make the peer review history of every article we publish publicly available.

When an article is published we post the peer reviewers' comments and the authors' responses online. We also post the versions of the paper that were used during peer review. These are the versions that the peer review comments apply to.

The versions of the paper that follow are the versions that were submitted during the peer review process. They are not the versions of record or the final published versions. They should not be cited or distributed as the published version of this manuscript.

BMJ Open is an open access journal and the full, final, typeset and author-corrected version of record of the manuscript is available on our site with no access controls, subscription charges or pay-per-view fees (<http://bmjopen.bmj.com>).

If you have any questions on BMJ Open's open peer review process please email [info.bmjopen@bmj.com](mailto:info.bmjopen@bmj.com)

# BMJ Open

## Prospective Pilot Study Evaluating Safety and Feasibility of Robot-assisted Nipple Sparing Mastectomy (RNSM)

|                               |                                                                                                                                                                                                                                                                                                                                                                                                                                                                                                                                                                                                                                                                                                                                                                                                                                                                                                                                                                                                                                                                                                                                                                                                                                                         |
|-------------------------------|---------------------------------------------------------------------------------------------------------------------------------------------------------------------------------------------------------------------------------------------------------------------------------------------------------------------------------------------------------------------------------------------------------------------------------------------------------------------------------------------------------------------------------------------------------------------------------------------------------------------------------------------------------------------------------------------------------------------------------------------------------------------------------------------------------------------------------------------------------------------------------------------------------------------------------------------------------------------------------------------------------------------------------------------------------------------------------------------------------------------------------------------------------------------------------------------------------------------------------------------------------|
| Journal:                      | <i>BMJ Open</i>                                                                                                                                                                                                                                                                                                                                                                                                                                                                                                                                                                                                                                                                                                                                                                                                                                                                                                                                                                                                                                                                                                                                                                                                                                         |
| Manuscript ID                 | bmjopen-2021-050173                                                                                                                                                                                                                                                                                                                                                                                                                                                                                                                                                                                                                                                                                                                                                                                                                                                                                                                                                                                                                                                                                                                                                                                                                                     |
| Article Type:                 | Protocol                                                                                                                                                                                                                                                                                                                                                                                                                                                                                                                                                                                                                                                                                                                                                                                                                                                                                                                                                                                                                                                                                                                                                                                                                                                |
| Date Submitted by the Author: | 16-Feb-2021                                                                                                                                                                                                                                                                                                                                                                                                                                                                                                                                                                                                                                                                                                                                                                                                                                                                                                                                                                                                                                                                                                                                                                                                                                             |
| Complete List of Authors:     | Park, Ko Un; The Ohio State University Wexner Medical Center<br>Department of Surgery, Division of Surgical Oncology<br>Lee, Sandy; The Ohio State University Wexner Medical Center<br>Department of Surgery, Division of Surgical Oncology<br>Sarna, Angela; The Ohio State University Wexner Medical Center<br>Department of Surgery, Division of Surgical Oncology<br>Chetta, Matthew; The Ohio State University Wexner Medical Center<br>Department of Plastic and Reconstructive Surgery<br>Schulz, Steven; The Ohio State University Wexner Medical Center<br>Department of Plastic and Reconstructive Surgery<br>Sisk, Geoffroy; The Ohio State University Wexner Medical Center<br>Department of Plastic and Reconstructive Surgery<br>Agnese, Doreen; The Ohio State University Wexner Medical Center<br>Department of Surgery, Division of Surgical Oncology<br>Grignol, Valerie; The Ohio State University Wexner Medical Center<br>Department of Surgery, Division of Surgical Oncology<br>Carson, William; The Ohio State University Wexner Medical Center<br>Department of Surgery, Division of Surgical Oncology<br>Skoracki, Roman; The Ohio State University Wexner Medical Center<br>Department of Plastic and Reconstructive Surgery |
| Keywords:                     | Breast surgery < SURGERY, PLASTIC & RECONSTRUCTIVE SURGERY,<br>Breast tumours < ONCOLOGY, ONCOLOGY                                                                                                                                                                                                                                                                                                                                                                                                                                                                                                                                                                                                                                                                                                                                                                                                                                                                                                                                                                                                                                                                                                                                                      |
|                               |                                                                                                                                                                                                                                                                                                                                                                                                                                                                                                                                                                                                                                                                                                                                                                                                                                                                                                                                                                                                                                                                                                                                                                                                                                                         |

SCHOLARONE™  
Manuscripts

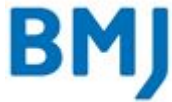

I, the Submitting Author has the right to grant and does grant on behalf of all authors of the Work (as defined in the below author licence), an exclusive licence and/or a non-exclusive licence for contributions from authors who are: i) UK Crown employees; ii) where BMJ has agreed a CC-BY licence shall apply, and/or iii) in accordance with the terms applicable for US Federal Government officers or employees acting as part of their official duties; on a worldwide, perpetual, irrevocable, royalty-free basis to BMJ Publishing Group Ltd ("BMJ") its licensees and where the relevant Journal is co-owned by BMJ to the co-owners of the Journal, to publish the Work in this journal and any other BMJ products and to exploit all rights, as set out in our [licence](#).

The Submitting Author accepts and understands that any supply made under these terms is made by BMJ to the Submitting Author unless you are acting as an employee on behalf of your employer or a postgraduate student of an affiliated institution which is paying any applicable article publishing charge ("APC") for Open Access articles. Where the Submitting Author wishes to make the Work available on an Open Access basis (and intends to pay the relevant APC), the terms of reuse of such Open Access shall be governed by a Creative Commons licence – details of these licences and which [Creative Commons](#) licence will apply to this Work are set out in our licence referred to above.

Other than as permitted in any relevant BMJ Author's Self Archiving Policies, I confirm this Work has not been accepted for publication elsewhere, is not being considered for publication elsewhere and does not duplicate material already published. I confirm all authors consent to publication of this Work and authorise the granting of this licence.

1  
2  
3 Title: Prospective Pilot Study Evaluating Safety and Feasibility of Robot-assisted Nipple Sparing  
4 Mastectomy (RNSM)  
5

6  
7 Authors: Ko Un Park MD<sup>1</sup>, Sandy Lee BA<sup>1</sup>, Angela Sarna BS<sup>1</sup>, Matthew Chetta MD<sup>2</sup>, Steven  
8 Schulz MD<sup>2</sup>, Geoffroy Sisk MD<sup>2</sup>, Doreen Agnese MD<sup>1</sup>, Valerie Grignol MD<sup>1</sup>, William Carson  
9 MD<sup>1</sup>, and Roman J Skoracki MD<sup>2</sup>  
10

11 Author Affiliations:

- 12  
13 1. Division of Surgical Oncology, Department of Surgery, The Ohio State University Wexner  
14 Medical Center James Cancer Hospital, Columbus, OH  
15  
16 2. Department of Plastic and Reconstructive Surgery, The Ohio State University Wexner  
17 Medical Center James Cancer Hospital, Columbus, OH  
18

19  
20 Brief title: Robot-assisted Nipple Sparing Mastectomy  
21

22  
23 Financial and conflict of interest disclosure: The authors have no relevant financial disclosure.  
24 The authors declare that there are no competing interests.  
25  
26  
27

28 Corresponding Author:

29 Ko Un Park, MD  
30 Assistant Professor of Surgery  
31 The Ohio State University Wexner Medical Center  
32 The James Cancer Hospital  
33 410 W 10<sup>th</sup> Ave, N908 Doan Hall  
34 Columbus, Ohio 43210  
35 Tel: 614-293-6708  
36 Fax: 614-293-3465  
37 [koun.park@osumc.edu](mailto:koun.park@osumc.edu)  
38  
39  
40

41 Requests for reprints should be addressed to:

42 Ko Un Park  
43 410 W 10<sup>th</sup> Ave, N908 Doan Hall  
44 Columbus, Ohio 43210  
45 Tel: 614-293-6708  
46  
47  
48  
49  
50

51 Word Count: 2759  
52  
53  
54  
55  
56  
57  
58  
59  
60

## ABSTRACT

### Introduction

Nipple sparing mastectomy (NSM) can be performed for treatment of breast cancer and risk reduction, but total mammary glandular excision in NSM can be technically challenging. Minimally invasive robot assisted NSM (RNSM) has the potential to improve the ergonomic challenges of open NSM. Recent studies in RNSM demonstrate the feasibility and safety of the procedure but this technique is still novel in the United States.

### Methods and analysis

This is a single arm prospective pilot study to determine safety, efficacy, and potential risks of RNSM. Up to 12 RNSM will be performed to assess the safety and feasibility of the procedure. Routine follow-up visits and study assessments will occur at 14 days, 30 days, 6 weeks, 6 months, and 12 months. The primary outcome is to assess feasibility of removing the breast gland en bloc using the RNSM technique. To assess safety, postoperative complication information will be collected. Secondary outcomes include defining benefits and challenges of RNSM for both surgeons and patients utilizing surveys, as well as defining the breast and nipple areolar complex (NAC) sensation recovery following RNSM. Mainly descriptive analysis will be used to report the findings.

**Ethics and dissemination** The RNSM protocol was reviewed and approved by the U.S. Food and Drug Administration (FDA) using the Investigational Device Exemption (IDE) mechanism (reference number G200096). In addition, the protocol was registered with clinicaltrials.gov (NCT04537312) and approved by The Ohio State University institutional review board (IRB), reference number 2020C0094 (8/18/2020). The results of this study will be distributed through peer-reviewed journals and presented at surgical conferences.

**Trial registration number:** NCT04537312

### STRENGTHS AND LIMITATIONS OF THIS STUDY

- This is the first US trial assessing the safety and feasibility of RNSM.
- Patient reported outcome data including nipple sensation after surgery are collected.
- If RNSM proves to be safe and feasible, the results will form the basis for a subsequent multi-center trial measuring oncologic outcomes.

## INTRODUCTION

Breast cancer is the most common solid tumor in women. With advances in breast reconstruction after mastectomy for the treatment of breast diseases including breast cancer, surgical techniques have evolved to preserve the skin flaps and nipple areolar complex (NAC) to give better aesthetic outcome without compromising oncologic outcome.[1, 2] Nipple sparing mastectomy (NSM) preserves the skin and nipple areolar complex for improved body image and patient satisfaction.[3-6] However, total mammary glandular excision for oncologic purposes in NSM can be technically challenging particularly due to small incision size in relation to the operative field and poor visualization of the dissection plane due to the curvature of the breast parenchyma and suboptimal illumination.[7] Surgeons experience greater physical symptoms such as neck and lower back pain, mental strain, and fatigue from performing NSM.[8] A more ergonomically sound technique with greater visualization is needed to improve surgeon ergonomics but also to improve the ease of the operation.

Open NSM results in variable rate of sensation in the nipple-areolar complex. In a study by Chirappappa et al, evaluation of 55 NSM for sensory recovery demonstrated 11 patients with partial sensation recovery in first 6 months.[9] Women undergoing risk reducing mastectomy with reconstruction report the breast feeling numb and lacking in sensation.[10] These changes in bodily sensations can have long-lasting quality of life repercussions and can actually cause harm as the skin acts as a functional protection against thermal injuries.[11, 12] Thus, understanding the sensation of the breast after RNSM from a patient-centered research perspective is important.

Additionally, traditional open NSM is associated with higher rates of mastectomy skin flap and nipple areolar complex necrosis if performed in larger breasted women.[13] While bra cup size is not a reliable marker for increased risk of complication, breast volume measured using the area visualized on mammogram can predict large volume associated with higher necrosis rate.[14] For instance, 45% of patients with breast volume on mammogram of 675 cc or larger had mastectomy flap or nipple areolar complex necrosis.[13] Currently, there is a need to develop innovative approach to NSM in women with larger breast size.

Minimally invasive robot assisted NSM (RNSM) has the potential to improve the safety and efficacy of NSM. Studies in RNSM demonstrate the feasibility and safety of performing a minimally invasive NSM using the da Vinci surgical system (Intuitive Surgical, Sunnyvale, CA, USA). Preliminary data from a randomized clinical study comparing 40 open to 40 robotic NSM cases indicate the safety of RNSM with regards to low perioperative complication rate and none of the patients had any mastectomy flap necrosis or loss of nipple due to complication.[15] In a recent publication of the updated series by Toesca et al, between June 2014 and January 2019, 73 women underwent 94 RNSM with immediate implant based breast reconstruction.[15] There were 39 patients with invasive breast cancer, 17 with ductal carcinoma in situ (DCIS), and 17 without cancer diagnosis but with BRCA mutation. The mean surgery time was 3 hours and 32 minutes. The most common complication after surgery was seroma (N=5) followed by eschar (N=4). The rates of infection and hematoma were low (N=2 each). Only 1 patient had necrosis after surgery. There was one patient in the series who had Stage IV disease at the time of surgery and died 4 months after surgery. Excluding this patient with metastatic disease, the disease-free survival rate was 100% with a median follow-up was 19 months (range 3.1–44.8). Long term oncologic safety of RNSM will take time for data to mature.

To study the technical feasibility and safety of RNSM, we performed a series of cadaveric RNSM and assessed the mastectomy flap for presence of residual breast tissue.[16] We were able to demonstrate that RNSM is technically feasible. Residual breast tissue was only

1  
2  
3 detectable in the NAC, and none was detectable in the mastectomy flap outside the NAC.

4 The technique of RNSM is still novel for U.S. surgeons and to date there are no published  
5 studies from US institutions because the use of the da Vinci surgical system is not FDA approved  
6 for use in breast surgery. This is partly due to the safety concerns expressed by the FDA, which  
7 stems from the inferior outcomes of minimally invasive surgery compared to open hysterectomy  
8 for cervical cancer.[17] In response to the safety concerns, our institution has received FDA  
9 approval of an Investigational Device Exemption (IDE) to initiate the RNSM clinical trial  
10 described here. This study aims to define the anatomic challenges and technical feasibility of  
11 RNSM and demonstrate its initial safety and efficacy profile. These data will inform a future,  
12 larger study of the procedure and help surgeons determine whether to consider the procedure for  
13 their practice.  
14  
15

## 16 17 **METHODS AND ANALYSIS**

### 18 **Study design**

19 This is a single arm prospective pilot study to determine safety, efficacy, and potential  
20 risks of Robotic Nipple Sparing Mastectomy (RNSM), funded by an Ohio State Intramural  
21 Research Program IDEA award and National Center for Advancing Translational Sciences  
22 award. Up to 20 subjects will be enrolled in order to perform 12 procedures of RNSM. This  
23 study will be performed in a single center, at The Ohio State University Wexner Medical Center  
24 James Comprehensive Cancer Center. All eligible interested patients must sign consent for  
25 enrollment into the robotic nipple sparing mastectomy clinical study.  
26

27 Eligible patients will undergo RNSM as previously described.[16] Briefly, the anterior  
28 axillary incision will be used for dissection. A subcutaneous dissection will be performed to  
29 create a working space. The single port system (GelPOINT Mini, Applied Medical, Rancho  
30 Santa Margarita, CA) will be inserted into the incision and the three 8-mm-diameter robot ports  
31 will be inserted and secured into the GelSeal Cap connected to an insufflator to keep the pressure  
32 at 8 mm Hg. Once the robot is docked, subcutaneous dissection will be performed using the  
33 monopolar-curved scissors and bipolar grasping forceps for traction and exposure. Using similar  
34 technique, the gland will be separated from the pectoralis major muscle. The specimen will be  
35 removed from the anterior axillary incision. All breast specimens will be evaluated by pathology  
36 through the institutional usual specimen processing protocol. To reconstruct the mound of the  
37 breast, plastic surgery will perform an immediate direct to implant-based reconstruction or TE  
38 placement using the anterior axillary line incision following the standard technique.  
39

40 Patients will be recovered in the postoperative phase following the usual standard of care.  
41 Routine follow-up visits and study assessments will occur at 14 days, 30 days, 6 weeks, 6  
42 months, and 12 months, as well as standard of care follow-up for surveillance for a minimum of  
43 5 years after surgery.  
44  
45  
46

### 47 **Study population and eligibility criteria**

48 Patients who present to the breast surgical oncology clinic will be screened for  
49 eligibility for robot-assisted nipple sparing mastectomy (RNSM). These patients typically have  
50 small breasts (bra cup size B or smaller, less than 500 grams of breast tissue) and no extensive  
51 ptosis of the breast. Prior to consenting, patients will be informed that cancer treatment  
52 outcomes using RNSM have not been evaluated by the FDA and this is an 'off label' use of the  
53 device. Eligible patients will be informed of the purpose, procedures, and potential risks of the  
54 study. Patients will be eligible for inclusion in the study if they meet all the following inclusion  
55  
56  
57  
58  
59  
60

criteria and excluded from participation in the study if they meet any of the following exclusion criteria (Table 1).

Table 1. Inclusion and exclusion criteria

| Inclusion criteria:                                                                                                                                                                                                                                                                                                                                                                                                                                                                                                                                                                                                                                                 | Exclusion criteria:                                                                                                                                                                                                                                                                                                                                                                                                                                                                                                                                                                                                                                                                                                                                                                                                                                                                              |
|---------------------------------------------------------------------------------------------------------------------------------------------------------------------------------------------------------------------------------------------------------------------------------------------------------------------------------------------------------------------------------------------------------------------------------------------------------------------------------------------------------------------------------------------------------------------------------------------------------------------------------------------------------------------|--------------------------------------------------------------------------------------------------------------------------------------------------------------------------------------------------------------------------------------------------------------------------------------------------------------------------------------------------------------------------------------------------------------------------------------------------------------------------------------------------------------------------------------------------------------------------------------------------------------------------------------------------------------------------------------------------------------------------------------------------------------------------------------------------------------------------------------------------------------------------------------------------|
| <ul style="list-style-type: none"> <li>• adults: age <math>\geq</math> 18 years</li> <li>• surgical candidates, per standard of care for: open nipple sparing resection and reconstruction for following indications:               <ul style="list-style-type: none"> <li>○ for risk reduction mastectomy</li> <li>○ treatment of ductal carcinoma in-situ or clinically node negative cT1-T3 breast cancer</li> </ul> </li> <li>• surgical candidates for open NSM, per standard of care, with regards to patient anatomic factors and tumor location</li> <li>• patient has an Eastern Cooperative Oncology Group (ECOG) performance status of 0 or 1</li> </ul> | <ul style="list-style-type: none"> <li>• pregnant</li> <li>• patients with:               <ul style="list-style-type: none"> <li>○ inflammatory breast cancer skin involvement with tumor pre-operative diagnosis (clinical, radiological or pathologic) of nipple-areola complex involvement with tumor</li> <li>○ grade 3 ptosis of nipple</li> <li>○ bra cup size greater than C cup</li> </ul> </li> <li>• current use of nicotine (ie. cigarette smoking, vaping, use of nicotine containing gum or transdermal patches or use of other forms of nicotine)</li> <li>• patients that are high risk for anesthesia, defined by the American Society of Anesthesiologists Scale ASA, grade 4 or higher</li> <li>• patients that do not have the ability to give informed consent</li> <li>• prisoner status at surgical clinic visit</li> <li>• previous thoracic radiation history</li> </ul> |

### Sample Size

The number of cases to enroll in the pilot study has been set to twelve based on a previous study investigating the learning curve of RNSM.[18] The previous study of 39 cases found that docking time, robot console time, and overall operative time decreased on the 13th case, thus concluding that 12 cases were needed to decrease the operative time.

### Subject withdrawal

Patients will be free to withdraw from the study at any point without consequence. Additionally, subjects may be withdrawn if during surgery the PI determines the patient requires surgery in the conventional manner and a pivot to this standard care surgery is immediately undertaken. For this initial trial, no patients will be replaced after their surgery for non-compliance to follow-up in The Ohio State University Wexner Medical Center breast oncological clinic.

## TRIAL PROCEDURES

### Surgery and biospecimen collection



Standard of care preoperative workup will be followed prior to surgery. RNSM will be performed using the da Vinci Robotic Surgical System, a software-controlled, electro-mechanical system designed for surgeons to perform minimally invasive surgery. The breast specimen will be removed via gentle manual extraction through the anterior axillary incision using the “waving flag technique” (move the gland back and forth and up and down gently until it is removed). For specimen extraction, no devices such as the morcellator will be used. To assure en bloc removal of the specimen, if it is not feasible to remove the entire gland as a single piece, the incision will be extended to assure removal of the intact specimen. The specimen will be labeled, as per standard of practice, with sutures and right/left orientation by the surgeon. All relevant data pertaining to the surgical procedure will be collected and breast specimens will be oriented for pathologic evaluation through the institution usual specimen processing protocol.

### **Post-operative phase**

Per the usual standard of care, the patient will follow up in the breast surgical oncology clinic around post-operative day 14, day 30, 6 months, and 1 year. Photographs and study-related assessments will be obtained and completed at each of the previously stated time points. All images will be taken in a fashion that minimizes subject identification, such as exclusion of the head and neck region, any identifiers removed including tattoos, birthmarks, etc. At 6 weeks, a review of the patient’s records will also occur to capture any re-operations/readmissions from a safety perspective. An implant exchange surgery will be performed around 3-6 months after expansion is complete or later if chemotherapy is required or the patient desires to wait.

### **Stopping Criteria**

The study will be stopped if a) en bloc removal of the breast specimen is not achieved during the RNSM surgery, or b) the specimen is incorrectly labeled or oriented for pathologic evaluation. Specimen labeling with sutures is a part of standard practice and is performed by the investigator-surgeon. Any occurrence of the aforementioned events will trigger a temporary suspension of further enrollment into the study until additional evaluation utilizing the Corrective And Preventive Action (CAPA) process has been completed. Should the study be stopped, all regulating bodies (e.g. FDA, data safety monitoring committee) will be notified.

### **Data collection and management**

The Ohio State Comprehensive Cancer Center clinical trial office research informatics services will be used as a central location for data processing and management, following standard operating procedures for the collection, storage, and analysis of electronic case report forms (eCRF). Data obtained from the patient’s electronic medical record and surveys will be stored on a secure drive on university password protected computers, and/or entered into a secure username/password protected database, using OnCore as the electronic data capture tool. Data will be accessible only to the research personnel approved for this study.

## **STUDY OBJECTIVES AND OUTCOMES**

The primary objectives are to generate preliminary data on the safety and complications from RNSM. En bloc resection and removal of the breast specimen will be assessed as a primary endpoint. We will also investigate the total duration of the operation, the frequency of conversion

1  
2  
3 to open technique, the length of hospitalization, and post-operative complications. Reported  
4 complications after RNSM include nipple areolar complex necrosis, mastectomy flap necrosis,  
5 temporary skin blistering, hematoma, seroma, infection, loss of implant from infection, delayed  
6 axillary wound healing, transient brachial plexus neurapraxia, and transient neurapraxia due to  
7 intraoperative patient positioning. Safety will be assessed by monitoring for all adverse  
8 events/serious adverse events, re-operations, and readmissions. Mastectomy and NAC necrosis  
9 will be assessed using a validated scoring system called the SKIN score.[19] To assess outcome,  
10 routine follow-up visits will occur at 14 days, 30 days, 6 weeks, 6 months, and 12 months.  
11 Patients will complete the study related assessments within the 12 months of completion of  
12 operation. Patients will continue standard of care follow-up for surveillance at minimum of 5  
13 years after surgery.  
14

15  
16 Beyond this, we aim to define the benefits and challenges of RNSM from the surgeon's  
17 perspective. Additional endpoints include NMSQ and SURG-TLX validated surveys to  
18 determine surgeon musculoskeletal fatigue. To assess patient satisfaction with the breast after  
19 surgery and sensation recovery after surgery, BREAST-Q and NAC modules for patient reported  
20 outcomes and satisfaction, and Semmes-Weinstein monofilament skin testing will be used. An  
21 exploratory endpoint is technical familiarity, which will be measured through operative robot  
22 console time.  
23

24 As part of standard of care, patients will follow up with the plastic and reconstructive  
25 surgery clinic on an annual basis for surveillance of long term known implant-related adverse  
26 events including but not limited to the following: capsular contraction, implant rupture and  
27 deflation, breast implant associated-anaplastic large cell lymphoma, asymmetry, chest wall  
28 deformity, extrusion, infection, malposition/displacement, seroma, skin rash, wrinkling/rippling  
29 of implant, and unsatisfactory shape/size.  
30

### 31 **Safety assessments**

32  
33 For this study, an adverse effect/event (AE) is defined as any untoward medical  
34 occurrence, unintended disease or injury, or untoward clinical signs. All observed or subject-  
35 described adverse effects/events—serious or non-serious—and abnormal test findings, regardless  
36 of suspected causal relationship to the investigational device or other procedures, will be  
37 assessed beginning on the day of surgery and at every follow-up visit thereafter. As part of  
38 standard of care, patients will follow up with the plastic and reconstructive surgery clinic on an  
39 annual basis for surveillance of long term known implant-related AEs. AEs or abnormal test  
40 findings felt to be associated with the investigational device or, if applicable, other study  
41 procedures will be followed until the effect (or its sequelae) or the abnormal test finding resolves  
42 or stabilizes at a level acceptable to the investigator. To ensure patient safety, all adverse events  
43 will be recorded, evaluated, and reported to FDA and IRB as required for all patient visits  
44 including long term follow-up.  
45  
46  
47

### 48 **Statistical Analysis Plan**

49 This is a single-arm pilot study for feasibility and safety. Mainly descriptive analysis will  
50 be used to report the findings. Patient demographics, pathologic data, perioperative data,  
51 complication rate, mastectomy skin flap and nipple areolar complex necrosis, monofilament  
52 testing and patient reported outcomes will be reported. Patient reported outcomes will be  
53 evaluated by specific domains and compared to previously reported results in the literature.[18]  
54 In addition, to compare the previously reported results in the literature with this study, one  
55  
56  
57  
58  
59

1  
2  
3 sample proportion test will be performed to compare the mastectomy flap complication  
4 proportion, conversion to open NSM proportion. One sample Wilcoxon signed-rank test will be  
5 used to assess the duration of surgery and length of hospital stay. For the analyses, statistical  
6 significance is set at two sided  $\alpha < 0.05$ .  
7

## 8 9 **PATIENT AND PUBLIC INVOLVEMENT**

10 Patients and the public were not directly involved in the development of the protocol  
11 design. However, our group discussed the study protocol with our local patient advocate prior to  
12 developing the trial design. We plan to actively engage with our patient advocates for future  
13 dissemination strategies and translation of the study findings to a larger multicenter trial.  
14

## 15 16 **ETHICS AND DISSEMINATION**

17 The trial will be conducted in accordance with Good Clinical Practices (GCP). The  
18 protocol was reviewed and approved by the U.S. Food and Drug Administration (FDA) using the  
19 Investigational Device Exemption (IDE) mechanism (reference number G200096). The trial was  
20 registered with clinicaltrials.gov (NCT04537312) and the investigational plan was approved by  
21 The Ohio State University Institutional Review Board (IRB) 2020C0094 (8/18/2020). Any  
22 amendments to the trial protocol will be submitted to the IRB for approval.  
23

24 The results of the study will be reported at appropriate scientific conferences. We plan to  
25 publish the trial results in a scientific, peer-reviewed journal. A full de-identified individual  
26 patient dataset of the trial will be made available after trial completion and publication upon  
27 request to the corresponding author.  
28

## 29 30 **ACKNOWLEDGEMENTS**

31 We thank Sue Marting with her assistance with obtaining the FDA Investigational Device  
32 Exemption.  
33

## 34 35 **CONTRIBUTORS**

36 The PI and first author of this paper (KP) initially designed the study protocol. Each co-author  
37 contributed to subsequent development of the protocol. KP wrote the initial draft of the  
38 manuscript. All authors approved the final version of this manuscript.  
39

## 40 41 **FUNDING**

42 This work was supported by the Ohio State University 2019 Intramural Research Program IDEA  
43 Award (46050-502730) and the National Center for Advancing Translational Sciences (award  
44 number UL1TR001070). The content is solely the responsibility of the authors and does not  
45 necessarily represent the official views of the National Center for Advancing Translational  
46 Sciences or the National Institute of Health.  
47  
48

## 49 50 **COMPETING INTERESTS STATEMENT**

51 None declared.  
52

## 53 54 **REFERENCES**

- 55 1. Galimberti V, Morigi C, Bagnardi V et al. Oncological Outcomes of Nipple-Sparing  
56 Mastectomy: A Single-Center Experience of 1989 Patients. *Ann Surg Oncol*  
57  
58  
59

- 2018;25:3849-3857.doi: 10.1245/s10434-018-6759-0
2. Smith BL, Tang R, Rai U et al. Oncologic Safety of Nipple-Sparing Mastectomy in Women with Breast Cancer. *J Am Coll Surg* 2017;225:361-365. doi:10.1016/j.jamcollsurg.2017.06.013
  3. Wei CH, Scott AM, Price AN et al. Psychosocial and Sexual Well-Being Following Nipple-Sparing Mastectomy and Reconstruction. *Breast J* 2016;22:10-17.doi: 10.1111/tbj.12542
  4. Djohan R, Gage E, Gatherwright J et al. Patient satisfaction following nipple-sparing mastectomy and immediate breast reconstruction: an 8-year outcome study. *Plast Reconstr Surg* 2010;125:818-829.doi:10.1097/PRS.0b013e3181ccdaa4
  5. Peled AW, Duralde E, Foster RD et al. Patient-reported outcomes and satisfaction after total skin- sparing mastectomy and immediate expander-implant reconstruction. *Ann Plast Surg* 2014;72(Suppl 1):S48- 52.doi:10.1097/SAP.0000000000000020
  6. Yoon-Flannery K, DeStefano LM, De La Cruz LM et al. Quality of life and sexual well-being after nipple sparing mastectomy: A matched comparison of patients using the breast Q. *J Surg Oncol* 2018;118:238-242.doi:10.1002/jso.25107
  7. Galimberti V, Vicini E, Corso G et al. Nipple-sparing and skin-sparing mastectomy: Review of aims, oncological safety and contraindications. *Breast* 2017;34(Suppl 1): S82-S84.doi:10.1016/j.breast.2017.06.034
  8. Jackson RS, Sanders T, Park A et al. Prospective Study Comparing Surgeons' Pain and Fatigue Associated with Nipple-Sparing versus Skin-Sparing Mastectomy. *Ann Surg Oncol* 2017;24:3024-3031.doi:10.1245/s10434-017-5929-9
  9. Park KU, Weiss A, Rosso K et al. Use of Mammographic Measurements to Predict Complications After Nipple-Sparing Mastectomy in BRCA Mutation Carriers. *Ann Surg Oncol* 2019;27:367-372.doi:10.1245/s10434-019-07704-1
  10. Chirappapha P, Srichan P, Lertsithichai P et al. Nipple-Areola Complex Sensation after Nipple- sparing Mastectomy. *Plast Reconstr Surg Glob Open* 2018;6:e1716. doi:10.1097/GOX.0000000000001716
  11. Hallowell N, Baylock B, Heiniger L et al. Looking different, feeling different: women's reactions to risk-reducing breast and ovarian surgery. *Fam Cancer* 2012;11:215-224. doi:10.1007/s10689-011-9504-4
  12. Temple CLF, Ross DC, Kim S et al. Sensibility following Innervated Free TRAM Flap for Breast Reconstruction: Part II. Innervation Improves Patient-Rated Quality of Life. *Plast Reconstr Surg* 2009;124:1419-1425.doi:10.1097/PRS.0b013e3181b98963
  13. Børsen-Koch M, Gunnarsson GL, Sørensen JA, Thomsen JB. Thermal injury in TAPIA breast reconstruction-thermal injury to thoracodorsal artery perforator flap. *Gland Surg* 2017;6:110-113.doi:10.21037/gs.2017.01.01
  14. Park KU, Weiss A, Rosso K, Yi M, Hunt K, Kuerer H, Hanson SE, Candelaria R, Tevis S, Thompson A. Use of Mammographic Measurements to Predict Complications After Nipple-Sparing Mastectomy in BRCA Mutation Carriers. *Ann Surg Oncol* 2020;27:367-372.doi:10.1245/s10434-019-07704-1
  15. Toesca A, Invento A, Massari G et al. Update on the Feasibility and Progress on Robotic Breast Surgery. *Ann Surg Oncol* 2019;26:3046-3051.doi:10.1245/s10434-019-07590-7
  16. Park KU, Tozbikian GH, Ferry D, Tsung A, Chetta M, Schulz S, Skoracki R. Residual breast tissue after robot-assisted nipple sparing mastectomy. *Breast* 2020;55:25-29.doi: 10.1016/j.breast.2020.11.022

- 1  
2  
3  
4  
5  
6  
7  
8  
9  
10  
11  
12  
13  
14  
15  
16  
17  
18  
19  
20  
21  
22  
23  
24  
25  
26  
27  
28  
29  
30  
31  
32  
33  
34  
35  
36  
37  
38  
39  
40  
41  
42  
43  
44  
45  
46  
47  
48  
49  
50  
51  
52  
53  
54  
55  
56  
57  
58  
59  
60
17. Ramirez PT, Frumovitz M, Pareja R, Lopez A, Vieira M, Ribeiro R, Buda A, Yan X, Shuzhong Y, Chetty N, Isla D, Tamura M, Zhu T, Robledo KP, Gebiski V, Asher R, Behan V, Nicklin JL, Coleman RL, Obermair A. Minimally Invasive versus Abdominal Radical Hysterectomy for Cervical Cancer. *N Engl J Med* 2018;379:1895-1904.doi: 10.1056/NEJMoa1806395
  18. Lai HW, Wang CC, Lai YC et al. The learning curve of robotic nipple sparing mastectomy for breast cancer: An analysis of consecutive 39 procedures with cumulative sum plot. *Eur J Surg Oncol* 2019;45:125-133.doi:10.1016/j.ejso.2018.09.021
  19. Lemaine V, Hoskin TL, Farley DR, Grant CS, Boughey JC, Torstenson TA, Jacobson SR, Jakub JW, Degnim AC. Introducing the SKIN score: a validated scoring system to assess severity of mastectomy skin flap necrosis. *Ann Surg Oncol* 2015;22:2925-32.doi: 10.1245/s10434-015-4409-3

# BMJ Open

## Prospective Pilot Study Protocol Evaluating Safety and Feasibility of Robot-assisted Nipple Sparing Mastectomy (RNSM)

|                                 |                                                                                                                                                                                                                                                                                                                                                                                                                                                                                                                                                                                                                                                                                                                                                                                                                                                                                                                                                                                                                                                                                                       |
|---------------------------------|-------------------------------------------------------------------------------------------------------------------------------------------------------------------------------------------------------------------------------------------------------------------------------------------------------------------------------------------------------------------------------------------------------------------------------------------------------------------------------------------------------------------------------------------------------------------------------------------------------------------------------------------------------------------------------------------------------------------------------------------------------------------------------------------------------------------------------------------------------------------------------------------------------------------------------------------------------------------------------------------------------------------------------------------------------------------------------------------------------|
| Journal:                        | <i>BMJ Open</i>                                                                                                                                                                                                                                                                                                                                                                                                                                                                                                                                                                                                                                                                                                                                                                                                                                                                                                                                                                                                                                                                                       |
| Manuscript ID                   | bmjopen-2021-050173.R1                                                                                                                                                                                                                                                                                                                                                                                                                                                                                                                                                                                                                                                                                                                                                                                                                                                                                                                                                                                                                                                                                |
| Article Type:                   | Protocol                                                                                                                                                                                                                                                                                                                                                                                                                                                                                                                                                                                                                                                                                                                                                                                                                                                                                                                                                                                                                                                                                              |
| Date Submitted by the Author:   | 14-Jul-2021                                                                                                                                                                                                                                                                                                                                                                                                                                                                                                                                                                                                                                                                                                                                                                                                                                                                                                                                                                                                                                                                                           |
| Complete List of Authors:       | Park, Ko Un; The Ohio State University Wexner Medical Center Department of Surgery, Division of Surgical Oncology<br>Lee, Sandy; The Ohio State University Wexner Medical Center Department of Surgery, Division of Surgical Oncology<br>Sarna, Angela; The Ohio State University Wexner Medical Center Department of Surgery, Division of Surgical Oncology<br>Chetta, Matthew; The Ohio State University Wexner Medical Center Department of Plastic and Reconstructive Surgery<br>Schulz, Steven; The Ohio State University Wexner Medical Center Department of Plastic and Reconstructive Surgery<br>Agnese, Doreen; The Ohio State University Wexner Medical Center Department of Surgery, Division of Surgical Oncology<br>Grignol, Valerie; The Ohio State University Wexner Medical Center Department of Surgery, Division of Surgical Oncology<br>Carson, William; The Ohio State University Wexner Medical Center Department of Surgery, Division of Surgical Oncology<br>Skoracki, Roman; The Ohio State University Wexner Medical Center Department of Plastic and Reconstructive Surgery |
| <b>Primary Subject Heading</b>: | Surgery                                                                                                                                                                                                                                                                                                                                                                                                                                                                                                                                                                                                                                                                                                                                                                                                                                                                                                                                                                                                                                                                                               |
| Secondary Subject Heading:      | Oncology                                                                                                                                                                                                                                                                                                                                                                                                                                                                                                                                                                                                                                                                                                                                                                                                                                                                                                                                                                                                                                                                                              |
| Keywords:                       | Breast surgery < SURGERY, PLASTIC & RECONSTRUCTIVE SURGERY, Breast tumours < ONCOLOGY, ONCOLOGY                                                                                                                                                                                                                                                                                                                                                                                                                                                                                                                                                                                                                                                                                                                                                                                                                                                                                                                                                                                                       |
|                                 |                                                                                                                                                                                                                                                                                                                                                                                                                                                                                                                                                                                                                                                                                                                                                                                                                                                                                                                                                                                                                                                                                                       |

SCHOLARONE™  
Manuscripts



I, the Submitting Author has the right to grant and does grant on behalf of all authors of the Work (as defined in the below author licence), an exclusive licence and/or a non-exclusive licence for contributions from authors who are: i) UK Crown employees; ii) where BMJ has agreed a CC-BY licence shall apply, and/or iii) in accordance with the terms applicable for US Federal Government officers or employees acting as part of their official duties; on a worldwide, perpetual, irrevocable, royalty-free basis to BMJ Publishing Group Ltd ("BMJ") its licensees and where the relevant Journal is co-owned by BMJ to the co-owners of the Journal, to publish the Work in this journal and any other BMJ products and to exploit all rights, as set out in our [licence](#).

The Submitting Author accepts and understands that any supply made under these terms is made by BMJ to the Submitting Author unless you are acting as an employee on behalf of your employer or a postgraduate student of an affiliated institution which is paying any applicable article publishing charge ("APC") for Open Access articles. Where the Submitting Author wishes to make the Work available on an Open Access basis (and intends to pay the relevant APC), the terms of reuse of such Open Access shall be governed by a Creative Commons licence – details of these licences and which [Creative Commons](#) licence will apply to this Work are set out in our licence referred to above.

Other than as permitted in any relevant BMJ Author's Self Archiving Policies, I confirm this Work has not been accepted for publication elsewhere, is not being considered for publication elsewhere and does not duplicate material already published. I confirm all authors consent to publication of this Work and authorise the granting of this licence.

1  
2  
3 Title: Prospective Pilot Study Protocol Evaluating Safety and Feasibility of Robot-assisted  
4 Nipple Sparing Mastectomy (RNSM)  
5  
6

7 Authors: Ko Un Park MD<sup>1</sup>, Sandy Lee BA<sup>1</sup>, Angela Sarna BS<sup>1</sup>, Matthew Chetta MD<sup>2</sup>, Steven  
8 Schulz MD<sup>2</sup>, Doreen Agnese MD<sup>1</sup>, Valerie Grignol MD<sup>1</sup>, William Carson MD<sup>1</sup>, and Roman J  
9 Skoracki MD<sup>2</sup>  
10

11 Author Affiliations:

- 12  
13 1. Division of Surgical Oncology, Department of Surgery, The Ohio State University Wexner  
14 Medical Center James Cancer Hospital, Columbus, OH  
15  
16 2. Department of Plastic and Reconstructive Surgery, The Ohio State University Wexner  
17 Medical Center James Cancer Hospital, Columbus, OH  
18

19 Brief title: Robot-assisted Nipple Sparing Mastectomy  
20  
21

22 Financial and conflict of interest disclosure: The authors have no relevant financial disclosure.  
23 The authors declare that there are no competing interests.  
24  
25

26  
27 Corresponding Author:

28 Ko Un Park, MD  
29 Assistant Professor of Surgery  
30 The Ohio State University Wexner Medical Center  
31 The James Cancer Hospital  
32 410 W 10<sup>th</sup> Ave, N908 Doan Hall  
33 Columbus, Ohio 43210  
34 Tel: 614-293-6708  
35 Fax: 614-293-3465  
36  
37 [Koun.park@osumc.edu](mailto:Koun.park@osumc.edu)  
38  
39

40 Requests for reprints should be addressed to:

41 Ko Un Park  
42 410 W 10<sup>th</sup> Ave, N908 Doan Hall  
43 Columbus, Ohio 43210  
44 Tel: 614-293-6708  
45  
46  
47  
48  
49

50 Word Count: 2630  
51  
52  
53  
54  
55  
56  
57  
58  
59  
60



## ABSTRACT

### Introduction

Nipple sparing mastectomy (NSM) can be performed for treatment of breast cancer and risk reduction, but total mammary glandular excision in NSM can be technically challenging. Minimally invasive robot assisted NSM (RNSM) has the potential to improve the ergonomic challenges of open NSM. Recent studies in RNSM demonstrate the feasibility and safety of the procedure but this technique is still novel in the United States.

### Methods and analysis

This is a single arm prospective pilot study to determine safety, efficacy, and potential risks of RNSM. Up to 12 RNSM will be performed to assess the safety and feasibility of the procedure. Routine follow-up visits and study assessments will occur at 14 days, 30 days, 6 weeks, 6 months, and 12 months. The primary outcome is to assess feasibility of removing the breast gland en bloc using the RNSM technique. To assess safety, postoperative complication information will be collected. Secondary outcomes include defining benefits and challenges of RNSM for both surgeons and patients utilizing surveys, as well as defining the breast and nipple areolar complex (NAC) sensation recovery following RNSM. Mainly descriptive analysis will be used to report the findings.

**Ethics and dissemination** The RNSM protocol was reviewed and approved by the U.S. Food and Drug Administration (FDA) using the Investigational Device Exemption (IDE) mechanism (reference number G200096). In addition, the protocol was registered with clinicaltrials.gov (NCT04537312) and approved by The Ohio State University institutional review board (IRB), reference number 2020C0094 (8/18/2020). The results of this study will be distributed through peer-reviewed journals and presented at surgical conferences.

**Trial registration number:** NCT04537312

### STRENGTHS AND LIMITATIONS OF THIS STUDY

- This is the first US investigator initiated trial assessing the safety and feasibility of RNSM.
- Patient reported outcome data including nipple sensation after surgery are collected.
- If RNSM proves to be safe and feasible, the results will form the basis for a subsequent multi-center trial measuring oncologic outcomes.
- The small sample size in this pilot study limit the comparison of RNSM outcomes to open NSM.

## INTRODUCTION

Breast cancer is the most common solid tumor in women. With advances in breast reconstruction after mastectomy for the treatment of breast diseases including breast cancer, surgical techniques have evolved to preserve the skin flaps and nipple areolar complex (NAC) to give better aesthetic outcome without compromising oncologic outcome.[1, 2] Nipple sparing mastectomy (NSM) preserves the skin and nipple areolar complex for improved body image and patient satisfaction.[3-6] However, total mammary glandular excision for oncologic purposes in NSM can be technically challenging particularly due to small incision size in relation to the operative field and poor visualization of the dissection plane due to the curvature of the breast parenchyma and suboptimal illumination.[7] Surgeons experience greater physical symptoms such as neck and lower back pain, mental strain, and fatigue from performing NSM.[8] A more ergonomically sound technique with greater visualization is needed to improve surgeon ergonomics but also to improve the ease of the operation.

Open NSM results in variable rate of sensation in the nipple-areolar complex. In a study by Chirappaha et al, evaluation of 55 NSM for sensory recovery demonstrated 11 patients with partial sensation recovery in first 6 months.[9] Women undergoing risk reducing mastectomy with reconstruction report the breast feeling numb and lacking in sensation.[10] These changes in bodily sensations can have long-lasting quality of life repercussions and can actually cause harm as the skin acts as a functional protection against thermal injuries.[11, 12] Thus, understanding the sensation of the breast after RNSM from a patient-centered research perspective is important.

Additionally, traditional open NSM is associated with higher rates of mastectomy skin flap and nipple areolar complex necrosis if performed in larger breasted women.[13] While bra cup size is not a reliable marker for increased risk of complication, breast volume measured using the area visualized on mammogram can predict large volume associated with higher necrosis rate. For instance, 45% of patients with breast volume on mammogram of 675 cc or larger had mastectomy flap or nipple areolar complex necrosis.[13] The increased risk of skin flap necrosis complication in larger breast size may be related to increased traction and trauma on the skin flap for dissection of larger surface area. Currently, there is a need to develop innovative approach to NSM in women with larger breast size.

Minimally invasive robot assisted NSM (RNSM) has the potential to improve the safety and efficacy of NSM. Studies in RNSM demonstrate the feasibility and safety of performing a minimally invasive NSM using the da Vinci surgical system (Intuitive Surgical, Sunnyvale, CA, USA). Preliminary data from a randomized clinical study comparing 40 open to 40 robotic NSM cases indicate the safety of RNSM with regards to low perioperative complication rate and none of the patients had any mastectomy flap necrosis or loss of nipple due to complication.[14] Additionally, in a recent study comparing surgical outcomes between conventional open NSM and RNSM, the latter was associated with significantly lower rates of high-grade post-operative complications and nipple necrosis. [15] In a recent publication of the updated series by Toesca et al, between June 2014 and January 2019, 73 women underwent 94 RNSM with immediate implant-based breast reconstruction.[14] There were 39 patients with invasive breast cancer, 17 with ductal carcinoma in situ (DCIS), and 17 without cancer diagnosis but with BRCA mutation. The mean surgery time was 3 hours and 32 minutes. The most common complication after surgery was seroma (N=5) followed by eschar (N=4). The rates of infection and hematoma were low (N=2 each). Only 1 patient had necrosis after surgery. There was one patient in the series who had Stage IV disease at the time of surgery and died 4 months after surgery. Excluding this patient with metastatic disease, the disease-free survival rate was 100% with a median follow-up

1  
2  
3 was 19 months (range 3.1–44.8). Long term oncologic safety of RNSM will take time for data to  
4 mature.

5 To study the technical feasibility and safety of RNSM, we performed a series of  
6 cadaveric RNSM and assessed the mastectomy flap for presence of residual breast tissue.[16] We  
7 were able to demonstrate that RNSM is technically feasible. Residual breast tissue was only  
8 detectable in the NAC, and none was detectable in the mastectomy flap outside the NAC.

9  
10 The technique of RNSM is still novel for U.S. surgeons and to date there are no published  
11 studies from US institutions because the use of the da Vinci surgical system is not FDA approved  
12 for use in breast surgery. This is partly due to the safety concerns expressed by the FDA, which  
13 stems from the inferior outcomes of minimally invasive surgery compared to open hysterectomy  
14 for cervical cancer.[17] In response to the safety concerns, our institution has received FDA  
15 approval of an Investigational Device Exemption (IDE) to initiate the RNSM clinical trial  
16 described here. This study aims to define the anatomic challenges and technical feasibility of  
17 RNSM and demonstrate its initial safety and efficacy profile. These data will inform a future,  
18 larger study of the procedure and help surgeons determine whether to consider the procedure for  
19 their practice.  
20  
21  
22

## 23 **METHODS AND ANALYSIS**

### 24 **Study design**

25 This is a single arm prospective pilot study to determine safety, efficacy, and potential  
26 risks of Robotic Nipple Sparing Mastectomy (RNSM), funded by an Ohio State Intramural  
27 Research Program IDEA award and National Center for Advancing Translational Sciences  
28 award. All operations will occur at The Ohio State University James Comprehensive Cancer  
29 Center. Up to 20 subjects will be enrolled in order to perform 12 procedures of RNSM. This  
30 study will be performed in a single center, at The Ohio State University Wexner Medical Center  
31 James Comprehensive Cancer Center. All eligible interested patients must sign consent for  
32 enrollment into the robotic nipple sparing mastectomy clinical study. For patients undergoing  
33 sentinel lymph node biopsy (SLNB) or axillary lymph node dissection (ALND) in the same  
34 operation, a separate small axillary incision will be made. This is similar to the approach taken in  
35 open NSM in our current practice. All axillary surgery will be performed in the traditional open  
36 manner.  
37  
38

39 Eligible patients will undergo RNSM as previously described.[16] Briefly, the anterior  
40 axillary incision will be used for dissection. The breast incision, measuring approximately 3cm,  
41 will be placed just lateral to the anterior axillary line. A subcutaneous dissection will be  
42 performed to create a working space. The single port system (GelPOINT Mini, Applied Medical,  
43 Rancho Santa Margarita, CA) combined with a small wound protector (Alexis Wound Protector,  
44 Applied Medical) will be inserted into the incision. By intussuscepting the wound protector with  
45 the single port system, we are able to move the fulcrum point of the robotic ports approximately  
46 10cm from the incision and thus create a larger working space for the robotic arms. The three 8-  
47 mm-diameter robot ports will be inserted and secured into the GelSeal Cap connected to an  
48 insufflator to keep the pressure at 8 mm Hg. Once the robot is docked, subcutaneous dissection  
49 will be performed using the monopolar-curved scissors and bipolar grasping forceps for traction  
50 and exposure. Using similar technique the gland will be separated from the pectoralis major  
51 muscle. The specimen will be removed from the anterior axillary incision. All breast specimens  
52 will be evaluated by pathology through the institutional usual specimen processing protocol. To  
53 reconstruct the mound of the breast, plastic surgery will perform an immediate direct to implant-  
54  
55  
56  
57  
58  
59  
60

1  
2  
3 based reconstruction or TE placement using the anterior axillary line incision following the  
4 standard technique.

5 Patients will be recovered in the postoperative phase following the usual standard of care.  
6 Routine follow-up visits and study assessments will occur at 14 days, 30 days, 6 weeks, 6  
7 months, and 12 months, as well as standard of care follow-up for surveillance for a minimum of  
8 5 years after surgery.  
9

### 10 11 **Study population and eligibility criteria**

12 Patients who present to the breast surgical oncology clinic will be screened for  
13 eligibility for robot-assisted nipple sparing mastectomy (RNSM). These patients typically have  
14 small breasts (bra cup size B or smaller, less than 500 grams of breast tissue) and no extensive  
15 ptosis of the breast. The cohort for this pilot study is limited to smaller breasted women  
16 (traditional open NSM candidates) but will expand in future studies to larger breasted patients  
17 (greater than C cup). Prior to consenting, patients will be informed that cancer treatment  
18 outcomes using RNSM have not been evaluated by the FDA and this is an 'off label' use of the  
19 device. Eligible patients will be informed of the purpose, procedures, and potential risks of the  
20 study. Patients will be eligible for inclusion in the study if they meet all the following inclusion  
21 criteria and excluded from participation in the study if they meet any of the following exclusion  
22 criteria (Table 1). Interested eligible patients will be screened and consented by the clinical  
23 research coordinator.  
24  
25  
26

### 27 **Sample Size**

28 The number of cases to enroll in the pilot study has been set to twelve based on a  
29 previous study investigating the learning curve of RNSM.[18] The previous study of 39 cases  
30 found that docking time, robot console time, and overall operative time decreased on the 13th  
31 case, thus concluding that 12 cases were needed to decrease the operative time.  
32  
33

### 34 **Subject withdrawal**

35 Patients will be free to withdraw from the study at any point without consequence.  
36 Additionally, subjects may be withdrawn if during surgery the PI determines the patient  
37 requires surgery in the conventional manner and a pivot to this standard care surgery is  
38 immediately undertaken. For this initial trial, no patients will be replaced after their surgery for  
39 non-compliance to follow-up in The Ohio State University Wexner Medical Center breast  
40 oncological clinic.  
41  
42

## 43 **TRIAL PROCEDURES**

### 44 **Surgery and biospecimen collection**

45 Standard of care preoperative workup will be followed prior to surgery. RNSM will be  
46 performed using the da Vinci Xi Robotic Surgical System, a software-controlled, electro-  
47 mechanical system designed for surgeons to perform minimally invasive surgery. The breast  
48 specimen will be removed via gentle manual extraction through the anterior axillary incision  
49 using the "waving flag technique" (move the gland back and forth and up and down gently until  
50 it is removed). For specimen extraction, no devices such as the morcellator will be used. To  
51 assure en bloc removal of the specimen, if it is not feasible to remove the entire gland as a single  
52 piece, the incision will be extended to assure removal of the intact specimen. The specimen will  
53 be labeled, as per standard of practice, with sutures and right/left orientation by the surgeon. All  
54  
55  
56  
57  
58  
59

1  
2  
3 relevant data pertaining to the surgical procedure will be collected and breast specimens will be  
4 oriented for pathologic evaluation through the institution usual specimen processing protocol.  
5 The entire robotic portion of the surgery will be recorded. Representative portions of the pre-  
6 docking and post-docking procedure will be videotaped as well.  
7

### 8 9 **Post-operative phase**

10 Per the usual standard of care, the patient will follow up in the breast surgical oncology  
11 clinic around post-operative day 14, day 30, 6 months, and 1 year. Pre-operative and post-  
12 operative photographs and study-related assessments will be obtained and completed at each of  
13 the previously stated time points. All images will be taken in a fashion that minimizes subject  
14 identification, such as exclusion of the head and neck region, any identifiers removed including  
15 tattoos, birthmarks, etc. At 6 weeks, a review of the patient's records will also occur to capture  
16 any re-operations/readmissions from a safety perspective. An implant exchange surgery will be  
17 performed around 3-6 months after expansion is complete or later if chemotherapy is required  
18 or the patient desires to wait.  
19  
20

### 21 22 **Stopping Criteria**

23 The study will be stopped if a) en bloc removal of the breast specimen is not achieved  
24 during the RNSM surgery, or b) the specimen is incorrectly labeled or oriented for pathologic  
25 evaluation. Specimen labeling with sutures is a part of standard practice and is performed by the  
26 investigator-surgeon. Any occurrence of the aforementioned events will trigger a temporary  
27 suspension of further enrollment into the study until additional evaluation utilizing the  
28 Corrective And Preventive Action (CAPA) process has been completed. Should the study be  
29 stopped, all regulating bodies (e.g. FDA, data safety monitoring committee) will be notified.  
30  
31

### 32 33 **Data collection and management**

34 The Ohio State Comprehensive Cancer Center clinical trial office research informatics  
35 services will be used as a central location for data processing and management, following  
36 standard operating procedures for the collection, storage, and analysis of electronic case report  
37 forms (eCRF). Data obtained from the patient's electronic medical record and surveys will be  
38 stored on a secure drive on university password protected computers, and/or entered into a secure  
39 username/password protected database, using OnCore as the electronic data capture tool. Data  
40 will be accessible only to the research personnel approved for this study. As part of the FDA IDE  
41 study, additional data will be provided to the FDA.  
42  
43  
44

## 45 **STUDY OBJECTIVES AND OUTCOMES**

46 The primary objectives are to generate preliminary data on the safety and complications  
47 from RNSM. En bloc resection and removal of the breast specimen will be assessed as a primary  
48 endpoint. We will also investigate the total duration of the operation, the frequency of conversion  
49 to open technique, the length of hospitalization, and post-operative complications. Reported  
50 complications after RNSM include nipple areolar complex necrosis, mastectomy flap necrosis,  
51 temporary skin blistering, hematoma, seroma, infection, loss of implant from infection, delayed  
52 axillary wound healing, transient brachial plexus neurapraxia, and transient neurapraxia due to  
53 intraoperative patient positioning. Safety will be assessed by monitoring for all adverse  
54 events/serious adverse events, re-operations, and readmissions. Mastectomy and NAC necrosis  
55  
56  
57  
58  
59

1  
2  
3 will be assessed using a validated scoring system called the SKIN score.[19] To assess outcome,  
4 routine follow-up visits will occur at 14 days, 30 days, 6 weeks, 6 months, and 12 months.  
5 Patients will complete the study related assessments within the 12 months of completion of  
6 operation. Patients will continue standard of care follow-up for surveillance at minimum of 5  
7 years after surgery.  
8

9 Beyond this, we aim to define the benefits and challenges of RNSM from the surgeon's  
10 perspective. Additional endpoints include NMSQ and SURG-TLX validated surveys to  
11 determine surgeon musculoskeletal fatigue. To assess patient satisfaction with the breast after  
12 surgery and sensation recovery after surgery, BREAST-Q and NAC modules for patient reported  
13 outcomes and satisfaction, and Semmes-Weinstein monofilament skin testing will be used. An  
14 exploratory endpoint is technical familiarity, which will be measured through operative robot  
15 console time.  
16

17 As part of standard of care, patients will follow up with the plastic and reconstructive  
18 surgery clinic on an annual basis for surveillance of long term known implant-related adverse  
19 events including but not limited to the following: capsular contraction, implant rupture and  
20 deflation, breast implant associated-anaplastic large cell lymphoma, asymmetry, chest wall  
21 deformity, extrusion, infection, malposition/displacement, seroma, skin rash, wrinkling/rippling  
22 of implant, and unsatisfactory shape/size.  
23

24 The current study is a pilot study to demonstrate initial feasibility. Ultimately, these data  
25 will be used to inform a larger multi-center study in the future. Specific outcomes of interest in  
26 future studies include oncologic safety and cost-effectiveness of RNSM.  
27

### 28 **Safety assessments**

29 For this study, an adverse effect/event (AE) is defined as any untoward medical  
30 occurrence, unintended disease or injury, or untoward clinical signs. All observed or subject-  
31 described adverse effects/events—serious or non-serious—and abnormal test findings, regardless  
32 of suspected causal relationship to the investigational device or other procedures, will be  
33 assessed beginning on the day of surgery and at every follow-up visit thereafter. As part of  
34 standard of care, patients will follow up with the plastic and reconstructive surgery clinic on an  
35 annual basis for surveillance of long term known implant-related AEs. AEs or abnormal test  
36 findings felt to be associated with the investigational device or, if applicable, other study  
37 procedures will be followed until the effect (or its sequelae) or the abnormal test finding resolves  
38 or stabilizes at a level acceptable to the investigator. To ensure patient safety, all adverse events  
39 will be recorded, evaluated, and reported to FDA and IRB as required for all patient visits  
40 including long term follow-up.  
41  
42  
43  
44

### 45 **Statistical Analysis Plan**

46 This is a single-arm pilot study for feasibility and safety. Mainly descriptive analysis will  
47 be used to report the findings. Patient demographics, pathologic data, perioperative data,  
48 complication rate, mastectomy skin flap and nipple areolar complex necrosis, monofilament  
49 testing and patient reported outcomes will be reported. Patient reported outcomes will be  
50 evaluated by specific domains and compared to previously reported results in the literature.[5] In  
51 addition, to compare the previously reported results in the literature with this study, one sample  
52 proportion test will be performed to compare the mastectomy flap complication proportion,  
53 conversion to open NSM proportion. One sample Wilcoxon signed-rank test will be used to  
54 assess the duration of surgery and length of hospital stay. For the analyses, statistical significance  
55  
56  
57  
58  
59

is set at two sided  $\alpha < 0.05$ .

## PATIENT AND PUBLIC INVOLVEMENT

Patients and the public were not directly involved in the development of the protocol design. However, our group discussed the study protocol with our local patient advocate prior to developing the trial design. We plan to actively engage with our patient advocates for future dissemination strategies and translation of the study findings to a larger multicenter trial.

## ETHICS AND DISSEMINATION

The trial will be conducted in accordance with Good Clinical Practices (GCP). The protocol was reviewed and approved by the U.S. Food and Drug Administration (FDA) using the Investigational Device Exemption (IDE) mechanism (reference number G200096). The trial was registered with clinicaltrials.gov (NCT04537312) and the investigational plan was approved by The Ohio State University Institutional Review Board (IRB) 2020C0094 (8/18/2020). Any amendments to the trial protocol will be submitted to the IRB for approval.

The results of the study will be reported at appropriate scientific conferences. We plan to publish the trial results in a scientific, peer-reviewed journal. A full de-identified individual patient dataset of the trial will be made available after trial completion and publication upon request to the corresponding author.

Table 1. Inclusion and exclusion criteria

| Inclusion criteria:                                                                                                                                                                                                                                                                                                                                                                                                                                                                                                                                                                                                                                                 | Exclusion criteria:                                                                                                                                                                                                                                                                                                                                                                                                                                                                                                                                                                                                                                                                                                                                                                                                                                                                              |
|---------------------------------------------------------------------------------------------------------------------------------------------------------------------------------------------------------------------------------------------------------------------------------------------------------------------------------------------------------------------------------------------------------------------------------------------------------------------------------------------------------------------------------------------------------------------------------------------------------------------------------------------------------------------|--------------------------------------------------------------------------------------------------------------------------------------------------------------------------------------------------------------------------------------------------------------------------------------------------------------------------------------------------------------------------------------------------------------------------------------------------------------------------------------------------------------------------------------------------------------------------------------------------------------------------------------------------------------------------------------------------------------------------------------------------------------------------------------------------------------------------------------------------------------------------------------------------|
| <ul style="list-style-type: none"> <li>• adults: age <math>\geq 18</math> years</li> <li>• surgical candidates, per standard of care for: open nipple sparing resection and reconstruction for following indications:               <ul style="list-style-type: none"> <li>○ for risk reduction mastectomy</li> <li>○ treatment of ductal carcinoma in-situ or clinically node negative cT1-T3 breast cancer</li> </ul> </li> <li>• surgical candidates for open NSM, per standard of care, with regards to patient anatomic factors and tumor location</li> <li>• patient has an Eastern Cooperative Oncology Group (ECOG) performance status of 0 or 1</li> </ul> | <ul style="list-style-type: none"> <li>• pregnant</li> <li>• patients with:               <ul style="list-style-type: none"> <li>○ inflammatory breast cancer skin involvement with tumor pre-operative diagnosis (clinical, radiological or pathologic) of nipple-areola complex involvement with tumor</li> <li>○ grade 3 ptosis of nipple</li> <li>○ bra cup size greater than C cup</li> </ul> </li> <li>• current use of nicotine (ie. cigarette smoking, vaping, use of nicotine containing gum or transdermal patches or use of other forms of nicotine)</li> <li>• patients that are high risk for anesthesia, defined by the American Society of Anesthesiologists Scale ASA, grade 4 or higher</li> <li>• patients that do not have the ability to give informed consent</li> <li>• prisoner status at surgical clinic visit</li> <li>• previous thoracic radiation history</li> </ul> |

## CONTRIBUTORS

The first author of this paper (KP) initially designed the study protocol. KP, AS, and RS contributed to initial planning of the trial. AS, RS, MC and SS contributed to initial preliminary data collection. Each co-author (KP, SL, AS, MC, SS, DA, VG, WC, and RS) contributed to subsequent development of the protocol. KP and SL wrote the initial draft of the manuscript. All authors (KP, SL, AS, MC, SS, DA, VG, WC, RS) approved the final version of this manuscript.

## FUNDING

This work was supported by the Ohio State University 2019 Intramural Research Program IDEA Award (46050-502730) and the National Center for Advancing Translational Sciences (award number UL1TR001070). The content is solely the responsibility of the authors and does not necessarily represent the official views of the National Center for Advancing Translational Sciences or the National Institute of Health.

## COMPETING INTERESTS STATEMENT

None declared.

## REFERENCES

1. Galimberti V, Morigi C, Bagnardi V et al. Oncological Outcomes of Nipple-Sparing Mastectomy: A Single-Center Experience of 1989 Patients. *Ann Surg Oncol* 2018;25:3849-3857.doi: 10.1245/s10434-018-6759-0
2. Smith BL, Tang R, Rai U et al. Oncologic Safety of Nipple-Sparing Mastectomy in Women with Breast Cancer. *J Am Coll Surg* 2017;225:361-365. doi:10.1016/j.jamcollsurg.2017.06.013
3. Wei CH, Scott AM, Price AN et al. Psychosocial and Sexual Well-Being Following Nipple-Sparing Mastectomy and Reconstruction. *Breast J* 2016;22:10-17.doi: 10.1111/tbj.12542
4. Djohan R, Gage E, Gatherwright J et al. Patient satisfaction following nipple-sparing mastectomy and immediate breast reconstruction: an 8-year outcome study. *Plast Reconstr Surg* 2010;125:818-829.doi:10.1097/PRS.0b013e3181ccdaa4
5. Peled AW, Duralde E, Foster RD et al. Patient-reported outcomes and satisfaction after total skin- sparing mastectomy and immediate expander-implant reconstruction. *Ann Plast Surg* 2014;72(Suppl 1):S48- 52.doi:10.1097/SAP.000000000000020
6. Yoon-Flannery K, DeStefano LM, De La Cruz LM et al. Quality of life and sexual well-being after nipple sp[Toesca, 2019 #14]aring mastectomy: A matched comparison of patients using the breast Q. *J Surg Oncol* 2018;118:238-242.doi:10.1002/jso.25107
7. Galimberti V, Vicini E, Corso G et al. Nipple-sparing and skin-sparing mastectomy: Review of aims, oncological safety and contraindications. *Breast* 2017;34(Suppl 1): S82-S84.doi:10.1016/j.breast.2017.06.034
8. Jackson RS, Sanders T, Park A et al. Prospective Study Comparing Surgeons' Pain and Fatigue Associated with Nipple-Sparing versus Skin-Sparing Mastectomy. *Ann Surg Oncol* 2017;24:3024-3031.doi:10.1245/s10434-017-5929-9
9. Chirappapha P, Srichan P, Lertsithichai P et al. Nipple-Areola Complex Sensation after Nipple- sparing Mastectomy. *Plast Reconstr Surg Glob Open* 2018;6:e1716. doi:10.1097/GOX.0000000000001716



10. Hallowell N, Baylock B, Heiniger L et al. Looking different, feeling different: women's reactions to risk-reducing breast and ovarian surgery. *Fam Cancer* 2012;11:215-224. doi:10.1007/s10689-011-9504-4
11. Temple CLF, Ross DC, Kim S et al. Sensibility following Innervated Free TRAM Flap for Breast Reconstruction: Part II. Innervation Improves Patient-Rated Quality of Life. *Plast Reconstr Surg* 2009;124:1419-1425. doi:10.1097/PRS.0b013e3181b98963
12. Børsen-Koch M, Gunnarsson GL, Sørensen JA, Thomsen JB. Thermal injury in TAPIA breast reconstruction-thermal injury to thoracodorsal artery perforator flap. *Gland Surg* 2017;6:110-113. doi:10.21037/gs.2017.01.01
13. Park KU, Weiss A, Rosso K et al. Use of Mammographic Measurements to Predict Complications After Nipple-Sparing Mastectomy in BRCA Mutation Carriers. *Ann Surg Oncol* 2020;27:367-372. doi:10.1245/s10434-019-07704-1
14. Toesca A, Invento A, Massari G et al. Update on the Feasibility and Progress on Robotic Breast Surgery. *Ann Surg Oncol* 2019;26:3046-3051. doi:10.1245/s10434-019-07590-7
15. Lee J, Park HS, Lee H, et al. Post-Operative Complications and Nipple Necrosis Rates Between Conventional and Robotic Nipple-Sparing Mastectomy. *Front Oncol* 2021;10(2924).
16. Park KU, Tozbikian GH, Ferry D, Tsung A, Chetta M, Schulz S, Skoracki R. Residual breast tissue after robot-assisted nipple sparing mastectomy. *Breast* 2020;55:25-29. doi: 10.1016/j.breast.2020.11.022
17. Ramirez PT, Frumovitz M, Pareja R, Lopez A, Vieira M, Ribeiro R, Buda A, Yan X, Shuzhong Y, Chetty N, Isla D, Tamura M, Zhu T, Robledo KP, GebSKI V, Asher R, Behan V, Nicklin JL, Coleman RL, Obermair A. Minimally Invasive versus Abdominal Radical Hysterectomy for Cervical Cancer. *N Engl J Med* 2018;379:1895-1904. doi: 10.1056/NEJMoa1806395
18. Lai HW, Wang CC, Lai YC et al. The learning curve of robotic nipple sparing mastectomy for breast cancer: An analysis of consecutive 39 procedures with cumulative sum plot. *Eur J Surg Oncol* 2019;45:125-133. doi:10.1016/j.ejso.2018.09.021
19. Lemaine V, Hoskin TL, Farley DR, Grant CS, Boughey JC, Torstenson TA, Jacobson SR, Jakub JW, Degnim AC. Introducing the SKIN score: a validated scoring system to assess severity of mastectomy skin flap necrosis. *Ann Surg Oncol* 2015;22:2925-32. doi: 10.1245/s10434-015-4409-3

## ACKNOWLEDGEMENTS

We thank Sue Marting with her assistance with obtaining the FDA Investigational Device Exemption.

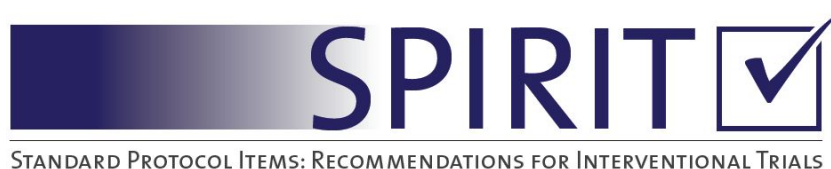

STANDARD PROTOCOL ITEMS: RECOMMENDATIONS FOR INTERVENTIONAL TRIALS

SPIRIT 2013 Checklist: Recommended items to address in a clinical trial protocol and related documents\*

| Section/item                      | Item No | Description                                                                                                                                                                                                                                                                              | Location in Manuscript               |
|-----------------------------------|---------|------------------------------------------------------------------------------------------------------------------------------------------------------------------------------------------------------------------------------------------------------------------------------------------|--------------------------------------|
| <b>Administrative information</b> |         |                                                                                                                                                                                                                                                                                          |                                      |
| Title                             | 1       | Descriptive title identifying the study design, population, interventions, and, if applicable, trial acronym                                                                                                                                                                             | Page 1 Line 1-2                      |
| Trial registration                | 2a      | Trial identifier and registry name. If not yet registered, name of intended registry                                                                                                                                                                                                     | Page 2 Line 27                       |
|                                   | 2b      | All items from the World Health Organization Trial Registration Data Set                                                                                                                                                                                                                 | Page 1, 4, 5, 6, 8 (Table 1)         |
| Protocol version                  | 3       | Date and version identifier                                                                                                                                                                                                                                                              | Page 1 Line 37-38                    |
| Funding                           | 4       | Sources and types of financial, material, and other support                                                                                                                                                                                                                              | Page 10 Line 31-33                   |
| Roles and responsibilities        | 5a      | Names, affiliations, and roles of protocol contributors                                                                                                                                                                                                                                  | Page 1 Line 4-12, Page 10 Line 26-28 |
|                                   | 5b      | Name and contact information for the trial sponsor                                                                                                                                                                                                                                       | N/A                                  |
|                                   | 5c      | Role of study sponsor and funders, if any, in study design; collection, management, analysis, and interpretation of data; writing of the report; and the decision to submit the report for publication, including whether they will have ultimate authority over any of these activities | Page 10 Line 33-35                   |
|                                   | 5d      | Composition, roles, and responsibilities of the coordinating centre, steering committee, endpoint adjudication committee, data management team, and other individuals or groups overseeing the trial, if applicable (see Item 21a for data monitoring committee)                         | N/A                                  |

**Introduction**

|    |                |    |                                                     |                |
|----|----------------|----|-----------------------------------------------------|----------------|
| 1  |                |    |                                                     |                |
| 2  | Background and | 6a | Description of research question and justification  | Page 3         |
| 3  | rationale      |    | for undertaking the trial, including summary of     |                |
| 4  |                |    | relevant studies (published and unpublished)        |                |
| 5  |                |    | examining benefits and harms for each               |                |
| 6  |                |    | intervention                                        |                |
| 7  |                |    |                                                     |                |
| 8  |                |    |                                                     |                |
| 9  |                | 6b | Explanation for choice of comparators               | Page 3, 4      |
| 10 | Objectives     | 7  | Specific objectives or hypotheses                   | Page 6, 7      |
| 11 |                |    |                                                     |                |
| 12 | Trial design   | 8  | Description of trial design including type of trial | Page 4 Line 20 |
| 13 |                |    | (eg, parallel group, crossover, factorial, single   |                |
| 14 |                |    | group), allocation ratio, and framework (eg,        |                |
| 15 |                |    | superiority, equivalence, noninferiority,           |                |
| 16 |                |    | exploratory)                                        |                |
| 17 |                |    |                                                     |                |
| 18 |                |    |                                                     |                |
| 19 |                |    |                                                     |                |

### Methods: Participants, interventions, and outcomes

|    |                      |     |                                                       |                 |
|----|----------------------|-----|-------------------------------------------------------|-----------------|
| 20 |                      |     |                                                       |                 |
| 21 |                      |     |                                                       |                 |
| 22 | Study setting        | 9   | Description of study settings (eg, community          | Page 4 Line 23- |
| 23 |                      |     | clinic, academic hospital) and list of countries      | 25              |
| 24 |                      |     | where data will be collected. Reference to where      |                 |
| 25 |                      |     | list of study sites can be obtained                   |                 |
| 26 |                      |     |                                                       |                 |
| 27 | Eligibility criteria | 10  | Inclusion and exclusion criteria for participants. If | Page 5 Line 8-  |
| 28 |                      |     | applicable, eligibility criteria for study centres    | 19, Page 8      |
| 29 |                      |     | and individuals who will perform the                  | (Table 1)       |
| 30 |                      |     | interventions (eg, surgeons, psychotherapists)        |                 |
| 31 |                      |     |                                                       |                 |
| 32 |                      |     |                                                       |                 |
| 33 | Interventions        | 11a | Interventions for each group with sufficient detail   | Page 5, 6       |
| 34 |                      |     | to allow replication, including how and when they     |                 |
| 35 |                      |     | will be administered                                  |                 |
| 36 |                      |     |                                                       |                 |
| 37 |                      |     |                                                       |                 |
| 38 |                      | 11b | Criteria for discontinuing or modifying allocated     | Page 6 Line 17- |
| 39 |                      |     | interventions for a given trial participant (eg,      | 23              |
| 40 |                      |     | drug dose change in response to harms,                |                 |
| 41 |                      |     | participant request, or improving/worsening           |                 |
| 42 |                      |     | disease)                                              |                 |
| 43 |                      |     |                                                       |                 |
| 44 |                      |     |                                                       |                 |
| 45 |                      | 11c | Strategies to improve adherence to intervention       | Page 5 Line 4-5 |
| 46 |                      |     | protocols, and any procedures for monitoring          |                 |
| 47 |                      |     | adherence (eg, drug tablet return, laboratory         |                 |
| 48 |                      |     | tests)                                                |                 |
| 49 |                      |     |                                                       |                 |
| 50 |                      |     |                                                       |                 |
| 51 |                      | 11d | Relevant concomitant care and interventions           | Page 4, 5       |
| 52 |                      |     | that are permitted or prohibited during the trial     |                 |
| 53 |                      |     |                                                       |                 |
| 54 |                      |     |                                                       |                 |
| 55 |                      |     |                                                       |                 |
| 56 |                      |     |                                                       |                 |
| 57 |                      |     |                                                       |                 |
| 58 |                      |     |                                                       |                 |
| 59 |                      |     |                                                       |                 |
| 60 |                      |     |                                                       |                 |

|    |                      |    |                                                                                                                                                                                                                                                                                                                                                                                |                   |
|----|----------------------|----|--------------------------------------------------------------------------------------------------------------------------------------------------------------------------------------------------------------------------------------------------------------------------------------------------------------------------------------------------------------------------------|-------------------|
| 1  |                      |    |                                                                                                                                                                                                                                                                                                                                                                                |                   |
| 2  | Outcomes             | 12 | Primary, secondary, and other outcomes, including the specific measurement variable (eg, systolic blood pressure), analysis metric (eg, change from baseline, final value, time to event), method of aggregation (eg, median, proportion), and time point for each outcome. Explanation of the clinical relevance of chosen efficacy and harm outcomes is strongly recommended | Page 6, 7         |
| 3  |                      |    |                                                                                                                                                                                                                                                                                                                                                                                |                   |
| 4  |                      |    |                                                                                                                                                                                                                                                                                                                                                                                |                   |
| 5  |                      |    |                                                                                                                                                                                                                                                                                                                                                                                |                   |
| 6  |                      |    |                                                                                                                                                                                                                                                                                                                                                                                |                   |
| 7  |                      |    |                                                                                                                                                                                                                                                                                                                                                                                |                   |
| 8  |                      |    |                                                                                                                                                                                                                                                                                                                                                                                |                   |
| 9  |                      |    |                                                                                                                                                                                                                                                                                                                                                                                |                   |
| 10 |                      |    |                                                                                                                                                                                                                                                                                                                                                                                |                   |
| 11 |                      |    |                                                                                                                                                                                                                                                                                                                                                                                |                   |
| 12 | Participant timeline | 13 | Time schedule of enrolment, interventions (including any run-ins and washouts), assessments, and visits for participants. A schematic diagram is highly recommended (see Figure)                                                                                                                                                                                               | Page 5, 6         |
| 13 |                      |    |                                                                                                                                                                                                                                                                                                                                                                                |                   |
| 14 |                      |    |                                                                                                                                                                                                                                                                                                                                                                                |                   |
| 15 |                      |    |                                                                                                                                                                                                                                                                                                                                                                                |                   |
| 16 |                      |    |                                                                                                                                                                                                                                                                                                                                                                                |                   |
| 17 |                      |    |                                                                                                                                                                                                                                                                                                                                                                                |                   |
| 18 |                      |    |                                                                                                                                                                                                                                                                                                                                                                                |                   |
| 19 | Sample size          | 14 | Estimated number of participants needed to achieve study objectives and how it was determined, including clinical and statistical assumptions supporting any sample size calculations                                                                                                                                                                                          | Page 5 Line 22-25 |
| 20 |                      |    |                                                                                                                                                                                                                                                                                                                                                                                |                   |
| 21 |                      |    |                                                                                                                                                                                                                                                                                                                                                                                |                   |
| 22 |                      |    |                                                                                                                                                                                                                                                                                                                                                                                |                   |
| 23 |                      |    |                                                                                                                                                                                                                                                                                                                                                                                |                   |
| 24 |                      |    |                                                                                                                                                                                                                                                                                                                                                                                |                   |
| 25 |                      |    |                                                                                                                                                                                                                                                                                                                                                                                |                   |
| 26 | Recruitment          | 15 | Strategies for achieving adequate participant enrolment to reach target sample size                                                                                                                                                                                                                                                                                            | Page 5 Line 8-19  |
| 27 |                      |    |                                                                                                                                                                                                                                                                                                                                                                                |                   |
| 28 |                      |    |                                                                                                                                                                                                                                                                                                                                                                                |                   |

### Methods: Assignment of interventions (for controlled trials)

#### Allocation:

|    |                                  |     |                                                                                                                                                                                                                                                                                                                                                          |     |
|----|----------------------------------|-----|----------------------------------------------------------------------------------------------------------------------------------------------------------------------------------------------------------------------------------------------------------------------------------------------------------------------------------------------------------|-----|
| 31 |                                  |     |                                                                                                                                                                                                                                                                                                                                                          |     |
| 32 |                                  |     |                                                                                                                                                                                                                                                                                                                                                          |     |
| 33 | Sequence generation              | 16a | Method of generating the allocation sequence (eg, computer-generated random numbers), and list of any factors for stratification. To reduce predictability of a random sequence, details of any planned restriction (eg, blocking) should be provided in a separate document that is unavailable to those who enrol participants or assign interventions | N/A |
| 34 |                                  |     |                                                                                                                                                                                                                                                                                                                                                          |     |
| 35 |                                  |     |                                                                                                                                                                                                                                                                                                                                                          |     |
| 36 |                                  |     |                                                                                                                                                                                                                                                                                                                                                          |     |
| 37 |                                  |     |                                                                                                                                                                                                                                                                                                                                                          |     |
| 38 |                                  |     |                                                                                                                                                                                                                                                                                                                                                          |     |
| 39 |                                  |     |                                                                                                                                                                                                                                                                                                                                                          |     |
| 40 |                                  |     |                                                                                                                                                                                                                                                                                                                                                          |     |
| 41 |                                  |     |                                                                                                                                                                                                                                                                                                                                                          |     |
| 42 |                                  |     |                                                                                                                                                                                                                                                                                                                                                          |     |
| 43 |                                  |     |                                                                                                                                                                                                                                                                                                                                                          |     |
| 44 | Allocation concealment mechanism | 16b | Mechanism of implementing the allocation sequence (eg, central telephone; sequentially numbered, opaque, sealed envelopes), describing any steps to conceal the sequence until interventions are assigned                                                                                                                                                | N/A |
| 45 |                                  |     |                                                                                                                                                                                                                                                                                                                                                          |     |
| 46 |                                  |     |                                                                                                                                                                                                                                                                                                                                                          |     |
| 47 |                                  |     |                                                                                                                                                                                                                                                                                                                                                          |     |
| 48 |                                  |     |                                                                                                                                                                                                                                                                                                                                                          |     |
| 49 |                                  |     |                                                                                                                                                                                                                                                                                                                                                          |     |
| 50 |                                  |     |                                                                                                                                                                                                                                                                                                                                                          |     |
| 51 | Implementation                   | 16c | Who will generate the allocation sequence, who will enrol participants, and who will assign participants to interventions                                                                                                                                                                                                                                | N/A |
| 52 |                                  |     |                                                                                                                                                                                                                                                                                                                                                          |     |
| 53 |                                  |     |                                                                                                                                                                                                                                                                                                                                                          |     |
| 54 |                                  |     |                                                                                                                                                                                                                                                                                                                                                          |     |
| 55 | Blinding (masking)               | 17a | Who will be blinded after assignment to interventions (eg, trial participants, care providers, outcome assessors, data analysts), and how                                                                                                                                                                                                                | N/A |
| 56 |                                  |     |                                                                                                                                                                                                                                                                                                                                                          |     |
| 57 |                                  |     |                                                                                                                                                                                                                                                                                                                                                          |     |
| 58 |                                  |     |                                                                                                                                                                                                                                                                                                                                                          |     |
| 59 |                                  |     |                                                                                                                                                                                                                                                                                                                                                          |     |
| 60 |                                  |     |                                                                                                                                                                                                                                                                                                                                                          |     |

- 1  
2  
3  
4  
5  
6  
7
- 17b If blinded, circumstances under which unblinding is permissible, and procedure for revealing a participant's allocated intervention during the trial N/A

8  
9

**Methods: Data collection, management, and analysis**

- 10  
11  
12  
13  
14  
15  
16  
17  
18  
19  
20  
21  
22  
23  
24  
25  
26  
27  
28  
29  
30  
31  
32  
33  
34  
35  
36  
37  
38  
39  
40  
41  
42  
43  
44  
45  
46  
47  
48  
49  
50
- |                         |     |                                                                                                                                                                                                                                                                                                                                                                                                              |                   |
|-------------------------|-----|--------------------------------------------------------------------------------------------------------------------------------------------------------------------------------------------------------------------------------------------------------------------------------------------------------------------------------------------------------------------------------------------------------------|-------------------|
| Data collection methods | 18a | Plans for assessment and collection of outcome, baseline, and other trial data, including any related processes to promote data quality (eg, duplicate measurements, training of assessors) and a description of study instruments (eg, questionnaires, laboratory tests) along with their reliability and validity, if known. Reference to where data collection forms can be found, if not in the protocol | Page 6 Line 26-34 |
|                         | 18b | Plans to promote participant retention and complete follow-up, including list of any outcome data to be collected for participants who discontinue or deviate from intervention protocols                                                                                                                                                                                                                    | Page 5 Line 4-5   |
| Data management         | 19  | Plans for data entry, coding, security, and storage, including any related processes to promote data quality (eg, double data entry; range checks for data values). Reference to where details of data management procedures can be found, if not in the protocol                                                                                                                                            | Page 6 Line 26-34 |
| Statistical methods     | 20a | Statistical methods for analysing primary and secondary outcomes. Reference to where other details of the statistical analysis plan can be found, if not in the protocol                                                                                                                                                                                                                                     | Page 7 Line 38-46 |
|                         | 20b | Methods for any additional analyses (eg, subgroup and adjusted analyses)                                                                                                                                                                                                                                                                                                                                     | Page 7 Line 38-46 |
|                         | 20c | Definition of analysis population relating to protocol non-adherence (eg, as randomised analysis), and any statistical methods to handle missing data (eg, multiple imputation)                                                                                                                                                                                                                              | N/A               |

51  
52  
53  
54  
55  
56  
57  
58  
59  
60

**Methods: Monitoring**

|    |                                 |     |                                                                                                                                                                                                                                                                                                                                       |
|----|---------------------------------|-----|---------------------------------------------------------------------------------------------------------------------------------------------------------------------------------------------------------------------------------------------------------------------------------------------------------------------------------------|
| 1  |                                 |     |                                                                                                                                                                                                                                                                                                                                       |
| 2  | Data monitoring                 | 21a | Composition of data monitoring committee (DMC); summary of its role and reporting structure; statement of whether it is independent from the sponsor and competing interests; and reference to where further details about its charter can be found, if not in the protocol. Alternatively, an explanation of why a DMC is not needed |
| 3  |                                 |     | Page 6 Line 26-34                                                                                                                                                                                                                                                                                                                     |
| 4  |                                 |     |                                                                                                                                                                                                                                                                                                                                       |
| 5  |                                 |     |                                                                                                                                                                                                                                                                                                                                       |
| 6  |                                 |     |                                                                                                                                                                                                                                                                                                                                       |
| 7  |                                 |     |                                                                                                                                                                                                                                                                                                                                       |
| 8  |                                 |     |                                                                                                                                                                                                                                                                                                                                       |
| 9  |                                 |     |                                                                                                                                                                                                                                                                                                                                       |
| 10 |                                 |     |                                                                                                                                                                                                                                                                                                                                       |
| 11 |                                 |     |                                                                                                                                                                                                                                                                                                                                       |
| 12 |                                 | 21b | Description of any interim analyses and stopping guidelines, including who will have access to these interim results and make the final decision to terminate the trial                                                                                                                                                               |
| 13 |                                 |     | Page 6 Line 17-23                                                                                                                                                                                                                                                                                                                     |
| 14 |                                 |     |                                                                                                                                                                                                                                                                                                                                       |
| 15 |                                 |     |                                                                                                                                                                                                                                                                                                                                       |
| 16 |                                 |     |                                                                                                                                                                                                                                                                                                                                       |
| 17 |                                 |     |                                                                                                                                                                                                                                                                                                                                       |
| 18 | Harms                           | 22  | Plans for collecting, assessing, reporting, and managing solicited and spontaneously reported adverse events and other unintended effects of trial interventions or trial conduct                                                                                                                                                     |
| 19 |                                 |     | Page 6 Line 17-23, Page 7 Line 24-35                                                                                                                                                                                                                                                                                                  |
| 20 |                                 |     |                                                                                                                                                                                                                                                                                                                                       |
| 21 |                                 |     |                                                                                                                                                                                                                                                                                                                                       |
| 22 |                                 |     |                                                                                                                                                                                                                                                                                                                                       |
| 23 |                                 |     |                                                                                                                                                                                                                                                                                                                                       |
| 24 | Auditing                        | 23  | Frequency and procedures for auditing trial conduct, if any, and whether the process will be independent from investigators and the sponsor                                                                                                                                                                                           |
| 25 |                                 |     | N/A                                                                                                                                                                                                                                                                                                                                   |
| 26 |                                 |     |                                                                                                                                                                                                                                                                                                                                       |
| 27 |                                 |     |                                                                                                                                                                                                                                                                                                                                       |
| 28 |                                 |     |                                                                                                                                                                                                                                                                                                                                       |
| 29 | <b>Ethics and dissemination</b> |     |                                                                                                                                                                                                                                                                                                                                       |
| 30 |                                 |     |                                                                                                                                                                                                                                                                                                                                       |
| 31 | Research ethics approval        | 24  | Plans for seeking research ethics committee/institutional review board (REC/IRB) approval                                                                                                                                                                                                                                             |
| 32 |                                 |     | Page 8 Line 10-15                                                                                                                                                                                                                                                                                                                     |
| 33 |                                 |     |                                                                                                                                                                                                                                                                                                                                       |
| 34 |                                 |     |                                                                                                                                                                                                                                                                                                                                       |
| 35 | Protocol amendments             | 25  | Plans for communicating important protocol modifications (eg, changes to eligibility criteria, outcomes, analyses) to relevant parties (eg, investigators, REC/IRBs, trial participants, trial registries, journals, regulators)                                                                                                      |
| 36 |                                 |     | Page 8 Line 10-15                                                                                                                                                                                                                                                                                                                     |
| 37 |                                 |     |                                                                                                                                                                                                                                                                                                                                       |
| 38 |                                 |     |                                                                                                                                                                                                                                                                                                                                       |
| 39 |                                 |     |                                                                                                                                                                                                                                                                                                                                       |
| 40 |                                 |     |                                                                                                                                                                                                                                                                                                                                       |
| 41 |                                 |     |                                                                                                                                                                                                                                                                                                                                       |
| 42 | Consent or assent               | 26a | Who will obtain informed consent or assent from potential trial participants or authorised surrogates, and how (see Item 32)                                                                                                                                                                                                          |
| 43 |                                 |     | Page 5 Line 18-19                                                                                                                                                                                                                                                                                                                     |
| 44 |                                 |     |                                                                                                                                                                                                                                                                                                                                       |
| 45 |                                 |     |                                                                                                                                                                                                                                                                                                                                       |
| 46 |                                 | 26b | Additional consent provisions for collection and use of participant data and biological specimens in ancillary studies, if applicable                                                                                                                                                                                                 |
| 47 |                                 |     | N/A                                                                                                                                                                                                                                                                                                                                   |
| 48 |                                 |     |                                                                                                                                                                                                                                                                                                                                       |
| 49 |                                 |     |                                                                                                                                                                                                                                                                                                                                       |
| 50 |                                 |     |                                                                                                                                                                                                                                                                                                                                       |
| 51 | Confidentiality                 | 27  | How personal information about potential and enrolled participants will be collected, shared, and maintained in order to protect confidentiality before, during, and after the trial                                                                                                                                                  |
| 52 |                                 |     | Page 6 Line 311-33                                                                                                                                                                                                                                                                                                                    |
| 53 |                                 |     |                                                                                                                                                                                                                                                                                                                                       |
| 54 |                                 |     |                                                                                                                                                                                                                                                                                                                                       |
| 55 |                                 |     |                                                                                                                                                                                                                                                                                                                                       |
| 56 |                                 |     |                                                                                                                                                                                                                                                                                                                                       |
| 57 | Declaration of interests        | 28  | Financial and other competing interests for principal investigators for the overall trial and each study site                                                                                                                                                                                                                         |
| 58 |                                 |     | Page 10 Line 38                                                                                                                                                                                                                                                                                                                       |
| 59 |                                 |     |                                                                                                                                                                                                                                                                                                                                       |
| 60 |                                 |     |                                                                                                                                                                                                                                                                                                                                       |

|    |                               |     |                                                                                                                                                                                                                                                                                     |                                      |
|----|-------------------------------|-----|-------------------------------------------------------------------------------------------------------------------------------------------------------------------------------------------------------------------------------------------------------------------------------------|--------------------------------------|
| 1  |                               |     |                                                                                                                                                                                                                                                                                     |                                      |
| 2  | Access to data                | 29  | Statement of who will have access to the final trial dataset, and disclosure of contractual agreements that limit such access for investigators                                                                                                                                     | Page 6 Line 26-34, Page 8 Line 16-19 |
| 3  |                               |     |                                                                                                                                                                                                                                                                                     |                                      |
| 4  |                               |     |                                                                                                                                                                                                                                                                                     |                                      |
| 5  |                               |     |                                                                                                                                                                                                                                                                                     |                                      |
| 6  |                               |     |                                                                                                                                                                                                                                                                                     |                                      |
| 7  | Ancillary and post-trial care | 30  | Provisions, if any, for ancillary and post-trial care, and for compensation to those who suffer harm from trial participation                                                                                                                                                       | N/A                                  |
| 8  |                               |     |                                                                                                                                                                                                                                                                                     |                                      |
| 9  |                               |     |                                                                                                                                                                                                                                                                                     |                                      |
| 10 |                               |     |                                                                                                                                                                                                                                                                                     |                                      |
| 11 |                               |     |                                                                                                                                                                                                                                                                                     |                                      |
| 12 | Dissemination policy          | 31a | Plans for investigators and sponsor to communicate trial results to participants, healthcare professionals, the public, and other relevant groups (eg, via publication, reporting in results databases, or other data sharing arrangements), including any publication restrictions | Page 8 Line 16-19                    |
| 13 |                               |     |                                                                                                                                                                                                                                                                                     |                                      |
| 14 |                               |     |                                                                                                                                                                                                                                                                                     |                                      |
| 15 |                               |     |                                                                                                                                                                                                                                                                                     |                                      |
| 16 |                               |     |                                                                                                                                                                                                                                                                                     |                                      |
| 17 |                               |     |                                                                                                                                                                                                                                                                                     |                                      |
| 18 |                               |     |                                                                                                                                                                                                                                                                                     |                                      |
| 19 |                               |     |                                                                                                                                                                                                                                                                                     |                                      |
| 20 |                               |     |                                                                                                                                                                                                                                                                                     |                                      |
| 21 |                               | 31b | Authorship eligibility guidelines and any intended use of professional writers                                                                                                                                                                                                      | Page 8 Line 16-19                    |
| 22 |                               |     |                                                                                                                                                                                                                                                                                     |                                      |
| 23 |                               |     |                                                                                                                                                                                                                                                                                     |                                      |
| 24 |                               |     |                                                                                                                                                                                                                                                                                     |                                      |
| 25 |                               | 31c | Plans, if any, for granting public access to the full protocol, participant-level dataset, and statistical code                                                                                                                                                                     | Page 8 Line 16-19                    |
| 26 |                               |     |                                                                                                                                                                                                                                                                                     |                                      |
| 27 |                               |     |                                                                                                                                                                                                                                                                                     |                                      |
| 28 |                               |     |                                                                                                                                                                                                                                                                                     |                                      |
| 29 | <b>Appendices</b>             |     |                                                                                                                                                                                                                                                                                     |                                      |
| 30 |                               |     |                                                                                                                                                                                                                                                                                     |                                      |
| 31 | Informed consent materials    | 32  | Model consent form and other related documentation given to participants and authorised surrogates                                                                                                                                                                                  | N/A                                  |
| 32 |                               |     |                                                                                                                                                                                                                                                                                     |                                      |
| 33 |                               |     |                                                                                                                                                                                                                                                                                     |                                      |
| 34 |                               |     |                                                                                                                                                                                                                                                                                     |                                      |
| 35 |                               |     |                                                                                                                                                                                                                                                                                     |                                      |
| 36 | Biological specimens          | 33  | Plans for collection, laboratory evaluation, and storage of biological specimens for genetic or molecular analysis in the current trial and for future use in ancillary studies, if applicable                                                                                      | N/A                                  |
| 37 |                               |     |                                                                                                                                                                                                                                                                                     |                                      |
| 38 |                               |     |                                                                                                                                                                                                                                                                                     |                                      |
| 39 |                               |     |                                                                                                                                                                                                                                                                                     |                                      |
| 40 |                               |     |                                                                                                                                                                                                                                                                                     |                                      |

---

\*It is strongly recommended that this checklist be read in conjunction with the SPIRIT 2013 Explanation & Elaboration for important clarification on the items. Amendments to the protocol should be tracked and dated. The SPIRIT checklist is copyrighted by the SPIRIT Group under the Creative Commons "[Attribution-NonCommercial-NoDerivs 3.0 Unported](https://creativecommons.org/licenses/by-nc-nd/3.0/)" license.

# BMJ Open

## Prospective Pilot Study Protocol Evaluating Safety and Feasibility of Robot-assisted Nipple Sparing Mastectomy (RNSM)

|                                 |                                                                                                                                                                                                                                                                                                                                                                                                                                                                                                                                                                                                                                                                                                                                                                                                                                                                                                                                                                                                                                                                                                       |
|---------------------------------|-------------------------------------------------------------------------------------------------------------------------------------------------------------------------------------------------------------------------------------------------------------------------------------------------------------------------------------------------------------------------------------------------------------------------------------------------------------------------------------------------------------------------------------------------------------------------------------------------------------------------------------------------------------------------------------------------------------------------------------------------------------------------------------------------------------------------------------------------------------------------------------------------------------------------------------------------------------------------------------------------------------------------------------------------------------------------------------------------------|
| Journal:                        | <i>BMJ Open</i>                                                                                                                                                                                                                                                                                                                                                                                                                                                                                                                                                                                                                                                                                                                                                                                                                                                                                                                                                                                                                                                                                       |
| Manuscript ID                   | bmjopen-2021-050173.R2                                                                                                                                                                                                                                                                                                                                                                                                                                                                                                                                                                                                                                                                                                                                                                                                                                                                                                                                                                                                                                                                                |
| Article Type:                   | Protocol                                                                                                                                                                                                                                                                                                                                                                                                                                                                                                                                                                                                                                                                                                                                                                                                                                                                                                                                                                                                                                                                                              |
| Date Submitted by the Author:   | 12-Oct-2021                                                                                                                                                                                                                                                                                                                                                                                                                                                                                                                                                                                                                                                                                                                                                                                                                                                                                                                                                                                                                                                                                           |
| Complete List of Authors:       | Park, Ko Un; The Ohio State University Wexner Medical Center Department of Surgery, Division of Surgical Oncology<br>Lee, Sandy; The Ohio State University Wexner Medical Center Department of Surgery, Division of Surgical Oncology<br>Sarna, Angela; The Ohio State University Wexner Medical Center Department of Surgery, Division of Surgical Oncology<br>Chetta, Matthew; The Ohio State University Wexner Medical Center Department of Plastic and Reconstructive Surgery<br>Schulz, Steven; The Ohio State University Wexner Medical Center Department of Plastic and Reconstructive Surgery<br>Agnese, Doreen; The Ohio State University Wexner Medical Center Department of Surgery, Division of Surgical Oncology<br>Grignol, Valerie; The Ohio State University Wexner Medical Center Department of Surgery, Division of Surgical Oncology<br>Carson, William; The Ohio State University Wexner Medical Center Department of Surgery, Division of Surgical Oncology<br>Skoracki, Roman; The Ohio State University Wexner Medical Center Department of Plastic and Reconstructive Surgery |
| <b>Primary Subject Heading</b>: | Surgery                                                                                                                                                                                                                                                                                                                                                                                                                                                                                                                                                                                                                                                                                                                                                                                                                                                                                                                                                                                                                                                                                               |
| Secondary Subject Heading:      | Oncology                                                                                                                                                                                                                                                                                                                                                                                                                                                                                                                                                                                                                                                                                                                                                                                                                                                                                                                                                                                                                                                                                              |
| Keywords:                       | Breast surgery < SURGERY, PLASTIC & RECONSTRUCTIVE SURGERY, Breast tumours < ONCOLOGY, ONCOLOGY                                                                                                                                                                                                                                                                                                                                                                                                                                                                                                                                                                                                                                                                                                                                                                                                                                                                                                                                                                                                       |
|                                 |                                                                                                                                                                                                                                                                                                                                                                                                                                                                                                                                                                                                                                                                                                                                                                                                                                                                                                                                                                                                                                                                                                       |

SCHOLARONE™  
Manuscripts





I, the Submitting Author has the right to grant and does grant on behalf of all authors of the Work (as defined in the below author licence), an exclusive licence and/or a non-exclusive licence for contributions from authors who are: i) UK Crown employees; ii) where BMJ has agreed a CC-BY licence shall apply, and/or iii) in accordance with the terms applicable for US Federal Government officers or employees acting as part of their official duties; on a worldwide, perpetual, irrevocable, royalty-free basis to BMJ Publishing Group Ltd ("BMJ") its licensees and where the relevant Journal is co-owned by BMJ to the co-owners of the Journal, to publish the Work in this journal and any other BMJ products and to exploit all rights, as set out in our [licence](#).

The Submitting Author accepts and understands that any supply made under these terms is made by BMJ to the Submitting Author unless you are acting as an employee on behalf of your employer or a postgraduate student of an affiliated institution which is paying any applicable article publishing charge ("APC") for Open Access articles. Where the Submitting Author wishes to make the Work available on an Open Access basis (and intends to pay the relevant APC), the terms of reuse of such Open Access shall be governed by a Creative Commons licence – details of these licences and which [Creative Commons](#) licence will apply to this Work are set out in our licence referred to above.

Other than as permitted in any relevant BMJ Author's Self Archiving Policies, I confirm this Work has not been accepted for publication elsewhere, is not being considered for publication elsewhere and does not duplicate material already published. I confirm all authors consent to publication of this Work and authorise the granting of this licence.

1  
2  
3 1 Title: Prospective Pilot Study Protocol Evaluating Safety and Feasibility of Robot-assisted  
4 2 Nipple Sparing Mastectomy (RNSM)  
5  
6 3

7 4 Authors: Ko Un Park MD<sup>1</sup>, Sandy Lee BA<sup>1</sup>, Angela Sarna BS<sup>1</sup>, Matthew Chetta MD<sup>2</sup>, Steven  
8 5 Schulz MD<sup>2</sup>, Doreen Agnese MD<sup>1</sup>, Valerie Grignol MD<sup>1</sup>, William Carson MD<sup>1</sup>, and Roman J  
9 6 Skoracki MD<sup>2</sup>  
10  
11 7

12 8 Author Affiliations:

13 9 1. Division of Surgical Oncology, Department of Surgery, The Ohio State University Wexner  
14 10 Medical Center James Cancer Hospital, Columbus, OH

15 11 2. Department of Plastic and Reconstructive Surgery, The Ohio State University Wexner  
16 12 Medical Center James Cancer Hospital, Columbus, OH  
17 12  
18 13

19 14 Brief title: Robot-assisted Nipple Sparing Mastectomy  
20  
21 15

22 16 Financial and conflict of interest disclosure: The authors have no relevant financial disclosure.  
23 17 The authors declare that there are no competing interests.  
24  
25 18  
26 19

27 20 Corresponding Author:

28 21 Ko Un Park, MD

29 22 Assistant Professor of Surgery

30 23 The Ohio State University Wexner Medical Center

31 24 The James Cancer Hospital

32 25 410 W 10<sup>th</sup> Ave, N908 Doan Hall

33 26 Columbus, Ohio 43210

34 27 Tel: 614-293-6708

35 28 Fax: 614-293-3465

36 29 [Koun.park@osumc.edu](mailto:Koun.park@osumc.edu)  
37  
38 30

39  
40 31 Requests for reprints should be addressed to:

41 32 Ko Un Park

42 33 410 W 10<sup>th</sup> Ave, N908 Doan Hall

43 34 Columbus, Ohio 43210

44 35 Tel: 614-293-6708  
45  
46 36  
47  
48  
49 37

50 38 Word Count: 2977  
51  
52  
53  
54  
55  
56  
57  
58  
59  
60

## 1 **ABSTRACT**

### 2 **Introduction**

3 Nipple sparing mastectomy (NSM) can be performed for treatment of breast cancer and risk  
4 reduction, but total mammary glandular excision in NSM can be technically challenging.  
5 Minimally invasive robot assisted NSM (RNSM) has the potential to improve the ergonomic  
6 challenges of open NSM. Recent studies in RNSM demonstrate the feasibility and safety of the  
7 procedure but this technique is still novel in the United States.  
8

### 9 **Methods and analysis**

10 This is a single arm prospective pilot study to determine safety, efficacy, and potential risks of  
11 RNSM. Up to 12 RNSM will be performed to assess the safety and feasibility of the procedure.  
12 Routine follow-up visits and study assessments will occur at 14 days, 30 days, 6 weeks, 6  
13 months, and 12 months. The primary outcome is to assess feasibility of removing the breast  
14 gland en bloc using the RNSM technique. To assess safety, postoperative complication  
15 information will be collected. Secondary outcomes include defining benefits and challenges of  
16 RNSM for both surgeons and patients utilizing surveys, as well as defining the breast and nipple  
17 areolar complex (NAC) sensation recovery following RNSM. Mainly descriptive analysis will be  
18 used to report the findings.  
19

20 **Ethics and dissemination** The RNSM protocol was reviewed and approved by the U.S. Food  
21 and Drug Administration (FDA) using the Investigational Device Exemption (IDE) mechanism  
22 (reference number G200096). In addition, the protocol was registered with clinicaltrials.gov  
23 (NCT04537312) and approved by The Ohio State University institutional review board (IRB),  
24 reference number 2020C0094 (8/18/2020). The results of this study will be distributed through  
25 peer-reviewed journals and presented at surgical conferences.  
26

27 **Trial registration number:** NCT04537312  
28  
29  
30

### 31 **STRENGTHS AND LIMITATIONS OF THIS STUDY**

- 32 • This is the first US investigator initiated trial assessing the safety and feasibility of  
33 RNSM.
- 34 • Patient reported outcome data including nipple sensation after surgery are collected.
- 35 • If RNSM proves to be safe and feasible, the results will form the basis for a subsequent  
36 multi-center trial measuring oncologic outcomes.
- 37 • The small sample size in this pilot study limit the comparison of RNSM outcomes to  
38 open NSM.  
39

## 1 INTRODUCTION

2 Breast cancer is the most common solid tumor in women. With advances in breast  
3 reconstruction after mastectomy for the treatment of breast diseases including breast cancer,  
4 surgical techniques have evolved to preserve the skin flaps and nipple areolar complex (NAC) to  
5 give better aesthetic outcome without compromising oncologic outcome.[1, 2] Nipple sparing  
6 mastectomy (NSM) preserves the skin and nipple areolar complex for improved body image and  
7 patient satisfaction.[3-6] However, total mammary glandular excision for oncologic purposes in  
8 NSM can be technically challenging particularly due to small incision size in relation to the  
9 operative field and poor visualization of the dissection plane due to the curvature of the breast  
10 parenchyma and suboptimal illumination.[7] Surgeons experience greater physical symptoms  
11 such as neck and lower back pain, mental strain, and fatigue from performing NSM.[8] A more  
12 ergonomically sound technique with greater visualization is needed to improve surgeon  
13 ergonomics but also to improve the ease of the operation.

14 Open NSM results in variable rate of sensation in the nipple-areolar complex. In a study  
15 by Chirappapha et al, evaluation of 55 NSM for sensory recovery demonstrated 11 patients with  
16 partial sensation recovery in first 6 months.[9] Women undergoing risk reducing mastectomy  
17 with reconstruction report the breast feeling numb and lacking in sensation.[10] These changes in  
18 bodily sensations can have long-lasting quality of life repercussions and can actually cause harm  
19 as the skin acts as a functional protection against thermal injuries.[11, 12] Thus, understanding  
20 the sensation of the breast after RNSM from a patient-centered research perspective is important.

21 Additionally, traditional open NSM is associated with higher rates of mastectomy skin  
22 flap and nipple areolar complex necrosis if performed in larger breasted women.[13] While bra  
23 cup size is not a reliable marker for increased risk of complication, breast volume measured  
24 using the area visualized on mammogram can predict large volume associated with higher  
25 necrosis rate. For instance, 45% of patients with breast volume on mammogram of 675 cc or  
26 larger had mastectomy flap or nipple areolar complex necrosis.[13] The increased risk of skin  
27 flap necrosis complication in larger breast size may be related to increased traction and trauma  
28 on the skin flap for dissection of larger surface area. Currently, there is a need to develop  
29 innovative approach to NSM in women with larger breast size.

30 Minimally invasive robot assisted NSM (RNSM) has the potential to improve the safety  
31 and efficacy of NSM. Studies in RNSM demonstrate the feasibility and safety of performing a  
32 minimally invasive NSM using the da Vinci surgical system (Intuitive Surgical, Sunnyvale, CA,  
33 USA). Preliminary data from a randomized clinical study comparing 40 open to 40 robotic NSM  
34 cases indicate the safety of RNSM with regards to low perioperative complication rate and none  
35 of the patients had any mastectomy flap necrosis or loss of nipple due to complication.[14]  
36 Additionally, in a recent study comparing surgical outcomes between conventional open NSM  
37 and RNSM, the latter was associated with significantly lower rates of high-grade post-operative  
38 complications and nipple necrosis. [15] In a recent publication of the updated series by Toesca et  
39 al, between June 2014 and January 2019, 73 women underwent 94 RNSM with immediate  
40 implant-based breast reconstruction.[14] There were 39 patients with invasive breast cancer, 17  
41 with ductal carcinoma in situ (DCIS), and 17 without cancer diagnosis but with BRCA mutation.  
42 The mean surgery time was 3 hours and 32 minutes. The most common complication after  
43 surgery was seroma (N=5) followed by eschar (N=4). The rates of infection and hematoma were  
44 low (N=2 each). Only 1 patient had necrosis after surgery. There was one patient in the series  
45 who had Stage IV disease at the time of surgery and died 4 months after surgery. Excluding this  
46 patient with metastatic disease, the disease-free survival rate was 100% with a median follow-up

1 was 19 months (range 3.1–44.8). Long term oncologic safety of RNSM will take time for data to  
2 mature.

3 To study the technical feasibility and safety of RNSM, we performed a series of  
4 cadaveric RNSM and assessed the mastectomy flap for presence of residual breast tissue.[16] We  
5 were able to demonstrate that RNSM is technically feasible. Residual breast tissue was only  
6 detectable in the NAC, and none was detectable in the mastectomy flap outside the NAC.

7 The technique of RNSM is still novel for U.S. surgeons and to date there are no published  
8 studies from US institutions because the use of the da Vinci surgical system is not FDA approved  
9 for use in breast surgery. This is partly due to the safety concerns expressed by the FDA, which  
10 stems from the inferior outcomes of minimally invasive surgery compared to open hysterectomy  
11 for cervical cancer.[17] In response to the safety concerns, our institution has received FDA  
12 approval of an Investigational Device Exemption (IDE) to initiate the RNSM clinical trial  
13 described here. This study aims to define the anatomic challenges and technical feasibility of  
14 RNSM and demonstrate its initial safety and efficacy profile. These data will inform a future,  
15 larger study of the procedure and help surgeons determine whether to consider the procedure for  
16 their practice.

## 18 **METHODS AND ANALYSIS**

### 19 **Study design**

20 This is a single arm prospective pilot study to determine safety, efficacy, and potential  
21 risks of Robotic Nipple Sparing Mastectomy (RNSM), funded by an Ohio State Intramural  
22 Research Program IDEA award and National Center for Advancing Translational Sciences  
23 award. The study start date is November 17, 2020. The estimated primary completion date is  
24 December 31, 2022 and estimated study completion date is December 31, 2023. All operations  
25 will occur at The Ohio State University James Comprehensive Cancer Center. Up to 20 subjects  
26 will be enrolled in order to perform 12 procedures of RNSM. This study will be performed in a  
27 single center, at The Ohio State University Wexner Medical Center James Comprehensive  
28 Cancer Center. All eligible interested patients must sign consent for enrollment into the robotic  
29 nipple sparing mastectomy clinical study. For patients undergoing sentinel lymph node biopsy  
30 (SLNB) or axillary lymph node dissection (ALND) in the same operation, a separate small  
31 axillary incision will be made. This is similar to the approach taken in open NSM in our current  
32 practice. All axillary surgery will be performed in the traditional open manner.

33 Eligible patients will undergo RNSM as previously described.[16] Briefly, the anterior  
34 axillary incision will be used for dissection. The breast incision, measuring approximately 3cm,  
35 will be placed just lateral to the anterior axillary line. A subcutaneous dissection will be  
36 performed to create a working space. The single port system (GelPOINT Mini, Applied Medical,  
37 Rancho Santa Margarita, CA) combined with a small wound protector (Alexis Wound Protector,  
38 Applied Medical) will be inserted into the incision. By intussuscepting the wound protector with  
39 the single port system, we are able to move the fulcrum point of the robotic ports approximately  
40 10cm from the incision and thus create a larger working space for the robotic arms. The three 8-  
41 mm-diameter robot ports will be inserted and secured into the GelSeal Cap connected to an  
42 insufflator to keep the pressure at 8 mm Hg. Once the robot is docked, subcutaneous dissection  
43 will be performed using the monopolar-curved scissors and bipolar grasping forceps for traction  
44 and exposure. Using similar technique the gland will be separated from the pectoralis major  
45 muscle. The specimen will be removed from the anterior axillary incision. All breast specimens  
46 will be evaluated by pathology through the institutional usual specimen processing protocol. To

1  
2  
3 1 reconstruct the mound of the breast, plastic surgery will perform an immediate direct to implant-  
4 2 based reconstruction or TE placement using the anterior axillary line incision following the  
5 3 standard technique.

6 4 Patients will be recovered in the postoperative phase following the usual standard of care.  
7 5 Routine follow-up visits and study assessments will occur at 14 days, 30 days, 6 weeks, 6  
8 6 months, and 12 months, as well as standard of care follow-up for surveillance for a minimum of  
9 7 5 years after surgery.  
10 8

### 9 **Study population and eligibility criteria**

10 10 Patients who present to the breast surgical oncology clinic will be screened for  
11 11 eligibility for robot-assisted nipple sparing mastectomy (RNSM). These patients typically have  
12 12 small breasts (bra cup size B or smaller, less than 500 grams of breast tissue) and no extensive  
13 13 ptosis of the breast. The cohort for this pilot study is limited to smaller breasted women  
14 14 (traditional open NSM candidates) but will expand in future studies to larger breasted patients  
15 15 (greater than C cup). Prior to consenting, patients will be informed that cancer treatment  
16 16 outcomes using RNSM have not been evaluated by the FDA and this is an 'off label' use of the  
17 17 device. Eligible patients will be informed of the purpose, procedures, and potential risks of the  
18 18 study. Patients will be eligible for inclusion in the study if they meet all the following inclusion  
19 19 criteria and excluded from participation in the study if they meet any of the following exclusion  
20 20 criteria (Table 1). Interested eligible patients will be screened and consented by the clinical  
21 21 research coordinator.  
22 22

### 23 **Sample Size**

24 24 The number of cases to enroll in the pilot study has been set to twelve based on a  
25 25 previous study investigating the learning curve of RNSM.[18] The previous study of 39 cases  
26 26 found that docking time, robot console time, and overall operative time decreased on the 13th  
27 27 case, thus concluding that 12 cases were needed to decrease the operative time.  
28 28

### 29 **Subject withdrawal**

30 30 Patients will be free to withdraw from the study at any point without consequence.  
31 31 Additionally, subjects may be withdrawn if during surgery the PI determines the patient  
32 32 requires surgery in the conventional manner and a pivot to this standard care surgery is  
33 33 immediately undertaken. For this initial trial, no patients will be replaced after their surgery for  
34 34 non-compliance to follow-up in The Ohio State University Wexner Medical Center breast  
35 35 oncological clinic.  
36 36

## 37 **TRIAL PROCEDURES**

### 38 **Surgery and biospecimen collection**

39 39 Standard of care preoperative workup will be followed prior to surgery. RNSM will be  
40 40 performed using the da Vinci Xi Robotic Surgical System, a software-controlled, electro-  
41 41 mechanical system designed for surgeons to perform minimally invasive surgery. The breast  
42 42 specimen will be removed via gentle manual extraction through the anterior axillary incision  
43 43 using the "waving flag technique" (move the gland back and forth and up and down gently until  
44 44 it is removed). For specimen extraction, no devices such as the morcellator will be used. To  
45 45 assure en bloc removal of the specimen, if it is not feasible to remove the entire gland as a single  
46 46 piece, the incision will be extended to assure removal of the intact specimen. The specimen will  
47 47  
48 48  
49 49  
50 50  
51 51  
52 52  
53 53  
54 54  
55 55  
56 56  
57 57  
58 58  
59 59  
60 60

1  
2  
3 1 be labeled, as per standard of practice, with sutures and right/left orientation by the surgeon. All  
4 2 relevant data pertaining to the surgical procedure will be collected and breast specimens will be  
5 3 oriented for pathologic evaluation through the institution usual specimen processing protocol.  
6 4 The entire robotic portion of the surgery will be recorded. Representative portions of the pre-  
7 5 docking and post-docking procedure will be videotaped as well.  
8 6

### 7 **Post-operative phase**

8 Per the usual standard of care, the patient will follow up in the breast surgical oncology  
9 clinic around post-operative day 14, day 30, 6 months, and 1 year. Pre-operative and post-  
10 10 operative photographs and study-related assessments will be obtained and completed at each of  
11 11 the previously stated time points. All images will be taken in a fashion that minimizes subject  
12 12 identification, such as exclusion of the head and neck region, any identifiers removed including  
13 13 tattoos, birthmarks, etc. At 6 weeks, a review of the patient's records will also occur to capture  
14 14 any re-operations/readmissions from a safety perspective. An implant exchange surgery will be  
15 15 performed around 3-6 months after expansion is complete or later if chemotherapy is required  
16 16 or the patient desires to wait.  
17 17

### 18 **Stopping Criteria**

19 The study will be stopped if a) en bloc removal of the breast specimen is not achieved  
20 20 during the RNSM surgery, or b) the specimen is incorrectly labeled or oriented for pathologic  
21 21 evaluation. Specimen labeling with sutures is a part of standard practice and is performed by the  
22 22 investigator-surgeon. Any occurrence of the aforementioned events will trigger a temporary  
23 23 suspension of further enrollment into the study until additional evaluation utilizing the  
24 24 Corrective And Preventive Action (CAPA) process has been completed. Should the study be  
25 25 stopped, all regulating bodies (e.g. FDA, data safety monitoring committee) will be notified.  
26 26

### 27 **Data collection and management**

28 The Ohio State Comprehensive Cancer Center clinical trial office research informatics  
29 29 services will be used as a central location for data processing and management, following  
30 30 standard operating procedures for the collection, storage, and analysis of electronic case report  
31 31 forms (eCRF). Data obtained from the patient's electronic medical record and surveys will be  
32 32 stored on a secure drive on university password protected computers, and/or entered into a secure  
33 33 username/password protected database, using OnCore as the electronic data capture tool. Data  
34 34 will be accessible only to the research personnel approved for this study. As part of the FDA IDE  
35 35 study, additional data will be provided to the FDA.  
36 36

## 37 **STUDY OBJECTIVES AND OUTCOMES**

38 The primary objectives are to generate preliminary data on the safety and complications  
39 39 from RNSM. En bloc resection and removal of the breast specimen will be assessed as a primary  
40 40 endpoint. We will also investigate the total duration of the operation, the frequency of conversion  
41 41 to open technique, the length of hospitalization, and post-operative complications. Reported  
42 42 complications after RNSM include nipple areolar complex necrosis, mastectomy flap necrosis,  
43 43 temporary skin blistering, hematoma, seroma, infection, loss of implant from infection, delayed  
44 44 axillary wound healing, transient brachial plexus neurapraxia, and transient neurapraxia due to  
45 45 intraoperative patient positioning. Safety will be assessed by monitoring for all adverse  
46 46  
47 47  
48 48  
49 49  
50 50  
51 51  
52 52  
53 53  
54 54  
55 55  
56 56  
57 57  
58 58  
59 59  
60 60

1 events/serious adverse events, re-operations, and readmissions. Mastectomy and NAC necrosis  
2 will be assessed using a validated scoring system called the SKIN score.[19] To assess outcome,  
3 routine follow-up visits will occur at 14 days, 30 days, 6 weeks, 6 months, and 12 months.  
4 Patients will complete the study related assessments within the 12 months of completion of  
5 operation. Patients will continue standard of care follow-up for surveillance at minimum of 5  
6 years after surgery.

7 Beyond this, we aim to define the benefits and challenges of RNSM from the surgeon's  
8 perspective. Additional endpoints include NMSQ and SURG-TLX validated surveys to  
9 determine surgeon musculoskeletal fatigue. To assess patient satisfaction with the breast after  
10 surgery and sensation recovery after surgery, BREAST-Q and NAC modules for patient reported  
11 outcomes and satisfaction, and Semmes-Weinstein monofilament skin testing will be used. An  
12 exploratory endpoint is technical familiarity, which will be measured through operative robot  
13 console time.

14 As part of standard of care, patients will follow up with the plastic and reconstructive  
15 surgery clinic on an annual basis for surveillance of long term known implant-related adverse  
16 events including but not limited to the following: capsular contraction, implant rupture and  
17 deflation, breast implant associated-anaplastic large cell lymphoma, asymmetry, chest wall  
18 deformity, extrusion, infection, malposition/displacement, seroma, skin rash, wrinkling/rippling  
19 of implant, and unsatisfactory shape/size.

20 The current study is a pilot study to demonstrate initial feasibility. Ultimately, these data  
21 will be used to inform a larger multi-center study in the future. Specific outcomes of interest in  
22 future studies include oncologic safety and cost-effectiveness of RNSM.

### 23 24 **Safety assessments**

25 For this study, an adverse effect/event (AE) is defined as any untoward medical  
26 occurrence, unintended disease or injury, or untoward clinical signs. All observed or subject-  
27 described adverse effects/events—serious or non-serious—and abnormal test findings, regardless  
28 of suspected causal relationship to the investigational device or other procedures, will be  
29 assessed beginning on the day of surgery and at every follow-up visit thereafter. As part of  
30 standard of care, patients will follow up with the plastic and reconstructive surgery clinic on an  
31 annual basis for surveillance of long term known implant-related AEs. AEs or abnormal test  
32 findings felt to be associated with the investigational device or, if applicable, other study  
33 procedures will be followed until the effect (or its sequelae) or the abnormal test finding resolves  
34 or stabilizes at a level acceptable to the investigator. To ensure patient safety, all adverse events  
35 will be recorded, evaluated, and reported to FDA and IRB as required for all patient visits  
36 including long term follow-up.

### 37 38 **Statistical Analysis Plan**

39 This is a single-arm pilot study for feasibility and safety. Mainly descriptive analysis will  
40 be used to report the findings. Patient demographics, pathologic data, perioperative data,  
41 complication rate, mastectomy skin flap and nipple areolar complex necrosis, monofilament  
42 testing and patient reported outcomes will be reported. Patient reported outcomes will be  
43 evaluated by specific domains and compared to previously reported results in the literature.[5] In  
44 addition, to compare the previously reported results in the literature with this study, one sample  
45 proportion test will be performed to compare the mastectomy flap complication proportion,  
46 conversion to open NSM proportion. One sample Wilcoxon signed-rank test will be used to



1 assess the duration of surgery and length of hospital stay. For the analyses, statistical significance  
 2 is set at two sided  $\alpha < 0.05$ .

### 3 PATIENT AND PUBLIC INVOLVEMENT

4 Patients and the public were not directly involved in the development of the protocol  
 5 design. However, our group discussed the study protocol with our local patient advocate prior to  
 6 developing the trial design. We plan to actively engage with our patient advocates for future  
 7 dissemination strategies and translation of the study findings to a larger multicenter trial.  
 8

### 9 ETHICS AND DISSEMINATION

10 The trial will be conducted in accordance with Good Clinical Practices (GCP). The  
 11 protocol was reviewed and approved by the U.S. Food and Drug Administration (FDA) using the  
 12 Investigational Device Exemption (IDE) mechanism (reference number G200096). The trial was  
 13 registered with clinicaltrials.gov (NCT04537312) and the investigational plan was approved by  
 14 The Ohio State University Institutional Review Board (IRB) 2020C0094 (8/18/2020). Any  
 15 amendments to the trial protocol will be submitted to the IRB for approval.  
 16

17 The results of the study will be reported at appropriate scientific conferences. We plan to  
 18 publish the trial results in a scientific, peer-reviewed journal. A full de-identified individual  
 19 patient dataset of the trial will be made available after trial completion and publication upon  
 20 request to the corresponding author.  
 21

22 Table 1. Inclusion and exclusion criteria

| Inclusion criteria:                                                                                                                                                                                                                                                                                                                                                                                                                                                                                                                                                                                                                                                 | Exclusion criteria:                                                                                                                                                                                                                                                                                                                                                                                                                                                                                                                                                                                                                                                                                                                                                                          |
|---------------------------------------------------------------------------------------------------------------------------------------------------------------------------------------------------------------------------------------------------------------------------------------------------------------------------------------------------------------------------------------------------------------------------------------------------------------------------------------------------------------------------------------------------------------------------------------------------------------------------------------------------------------------|----------------------------------------------------------------------------------------------------------------------------------------------------------------------------------------------------------------------------------------------------------------------------------------------------------------------------------------------------------------------------------------------------------------------------------------------------------------------------------------------------------------------------------------------------------------------------------------------------------------------------------------------------------------------------------------------------------------------------------------------------------------------------------------------|
| <ul style="list-style-type: none"> <li>• adults: age <math>\geq 18</math> years</li> <li>• surgical candidates, per standard of care for: open nipple sparing resection and reconstruction for following indications:               <ul style="list-style-type: none"> <li>○ for risk reduction mastectomy</li> <li>○ treatment of ductal carcinoma in-situ or clinically node negative cT1-T3 breast cancer</li> </ul> </li> <li>• surgical candidates for open NSM, per standard of care, with regards to patient anatomic factors and tumor location</li> <li>• patient has an Eastern Cooperative Oncology Group (ECOG) performance status of 0 or 1</li> </ul> | <ul style="list-style-type: none"> <li>• pregnant</li> <li>• patients with:               <ul style="list-style-type: none"> <li>○ inflammatory breast cancer skin involvement with tumor pre-operative diagnosis (clinical, radiological or pathologic) of nipple-areola complex involvement with tumor</li> <li>○ grade 3 ptosis of nipple</li> <li>○ bra cup size greater than C cup</li> </ul> </li> <li>• Smokers with heavy current use of nicotine (defined as <math>&gt; 20</math> cigarettes/day)</li> <li>• patients that are high risk for anesthesia, defined by the American Society of Anesthesiologists Scale ASA, grade 4 or higher</li> <li>• patients that do not have the ability to give informed consent</li> <li>• prisoner status at surgical clinic visit</li> </ul> |

- |  |                                                                                         |
|--|-----------------------------------------------------------------------------------------|
|  | <ul style="list-style-type: none"> <li>• previous thoracic radiation history</li> </ul> |
|--|-----------------------------------------------------------------------------------------|

## CONTRIBUTORS

The first author of this paper (KP) initially designed the study protocol. KP, AS, and RS contributed to initial planning of the trial. AS, RS, MC and SS contributed to initial preliminary data collection. Each co-author (KP, SL, AS, MC, SS, DA, VG, WC, and RS) contributed to subsequent development of the protocol. KP and SL wrote the initial draft of the manuscript. All authors (KP, SL, AS, MC, SS, DA, VG, WC, RS) approved the final version of this manuscript.

## FUNDING

This work was supported by the Ohio State University 2019 Intramural Research Program IDEA Award (46050-502730) and the National Center for Advancing Translational Sciences (award number UL1TR001070). The content is solely the responsibility of the authors and does not necessarily represent the official views of the National Center for Advancing Translational Sciences or the National Institute of Health.

## COMPETING INTERESTS STATEMENT

None declared.

## REFERENCES

- Galimberti V, Morigi C, Bagnardi V et al. Oncological Outcomes of Nipple-Sparing Mastectomy: A Single-Center Experience of 1989 Patients. *Ann Surg Oncol* 2018;25:3849-3857.doi: 10.1245/s10434-018-6759-0
- Smith BL, Tang R, Rai U et al. Oncologic Safety of Nipple-Sparing Mastectomy in Women with Breast Cancer. *J Am Coll Surg* 2017;225:361-365. doi:10.1016/j.jamcollsurg.2017.06.013
- Wei CH, Scott AM, Price AN et al. Psychosocial and Sexual Well-Being Following Nipple-Sparing Mastectomy and Reconstruction. *Breast J* 2016;22:10-17.doi: 10.1111/tbj.12542
- Djohan R, Gage E, Gatherwright J et al. Patient satisfaction following nipple-sparing mastectomy and immediate breast reconstruction: an 8-year outcome study. *Plast Reconstr Surg* 2010;125:818-829.doi:10.1097/PRS.0b013e3181ccdaa4
- Peled AW, Duralde E, Foster RD et al. Patient-reported outcomes and satisfaction after total skin- sparing mastectomy and immediate expander-implant reconstruction. *Ann Plast Surg* 2014;72(Suppl 1):S48- 52.doi:10.1097/SAP.0000000000000020
- Yoon-Flannery K, DeStefano LM, De La Cruz LM et al. Quality of life and sexual well-being after nipple sp[Toesca, 2019 #14]aring mastectomy: A matched comparison of patients using the breast Q. *J Surg Oncol* 2018;118:238-242.doi:10.1002/jso.25107
- Galimberti V, Vicini E, Corso G et al. Nipple-sparing and skin-sparing mastectomy: Review of aims, oncological safety and contraindications. *Breast* 2017;34(Suppl 1): S82-S84.doi:10.1016/j.breast.2017.06.034
- Jackson RS, Sanders T, Park A et al. Prospective Study Comparing Surgeons' Pain and Fatigue Associated with Nipple-Sparing versus Skin-Sparing Mastectomy. *Ann Surg Oncol* 2017;24:3024-3031.doi:10.1245/s10434-017-5929-9

- 1 9. Chirappapha P, Srichan P, Lertsithichai P et al. Nipple-Areola Complex Sensation after  
2 Nipple- sparing Mastectomy. *Plast Reconstr Surg Glob Open* 2018;6:e1716.  
3 doi:10.1097/GOX.0000000000001716
- 4 10. Hallowell N, Baylock B, Heiniger L et al. Looking different, feeling different: women's  
5 reactions to risk-reducing breast and ovarian surgery. *Fam Cancer* 2012;11:215-224.  
6 doi:10.1007/s10689-011-9504-4
- 7 11. Temple CLF, Ross DC, Kim S et al. Sensibility following Innervated Free TRAM Flap  
8 for Breast Reconstruction: Part II. Innervation Improves Patient-Rated Quality of Life.  
9 *Plast Reconstr Surg* 2009;124:1419-1425.doi:10.1097/PRS.0b013e3181b98963
- 10 12. Børsen-Koch M, Gunnarsson GL, Sørensen JA, Thomsen JB. Thermal injury in TAPIA  
11 breast reconstruction-thermal injury to thoracodorsal artery perforator flap. *Gland Surg*  
12 2017;6:110-113.doi:10.21037/gs.2017.01.01
- 13 13. Park KU, Weiss A, Rosso K et al. Use of Mammographic Measurements to Predict  
14 Complications After Nipple-Sparing Mastectomy in BRCA Mutation Carriers. *Ann Surg*  
15 *Oncol* 2020;27:367-372.doi:10.1245/s10434-019-07704-1
- 16 14. Toesca A, Invento A, Massari G et al. Update on the Feasibility and Progress on Robotic  
17 Breast Surgery. *Ann Surg Oncol* 2019;26:3046-3051.doi:10.1245/s10434-019-07590-7
- 18 15. Lee J, Park HS, Lee H, et al. Post-Operative Complications and Nipple Necrosis Rates  
19 Between Conventional and Robotic Nipple-Sparing Mastectomy. *Front Oncol*  
20 2021;10(2924).
- 21 16. Park KU, Tozbikian GH, Ferry D, Tsung A, Chetta M, Schulz S, Skoracki R. Residual  
22 breast tissue after robot-assisted nipple sparing mastectomy. *Breast* 2020;55:25-29.doi:  
23 10.1016/j.breast.2020.11.022
- 24 17. Ramirez PT, Frumovitz M, Pareja R, Lopez A, Vieira M, Ribeiro R, Buda A, Yan X,  
25 Shuzhong Y, Chetty N, Isla D, Tamura M, Zhu T, Robledo KP, GebSKI V, Asher R,  
26 Behan V, Nicklin JL, Coleman RL, Obermair A. Minimally Invasive versus Abdominal  
27 Radical Hysterectomy for Cervical Cancer. *N Engl J Med* 2018;379:1895-1904.doi:  
28 10.1056/NEJMoa1806395
- 29 18. Lai HW, Wang CC, Lai YC et al. The learning curve of robotic nipple sparing  
30 mastectomy for breast cancer: An analysis of consecutive 39 procedures with cumulative  
31 sum plot. *Eur J Surg Oncol* 2019;45:125-133.doi:10.1016/j.ejso.2018.09.021
- 32 19. Lemaine V, Hoskin TL, Farley DR, Grant CS, Boughey JC, Torstenson TA, Jacobson  
33 SR, Jakub JW, Degnim AC. Introducing the SKIN score: a validated scoring system to  
34 assess severity of mastectomy skin flap necrosis. *Ann Surg Oncol* 2015;22:2925-32.doi:  
35 10.1245/s10434-015-4409-3

## 36 37 38 **ACKNOWLEDGEMENTS**

39 We thank Sue Marting with her assistance with obtaining the FDA Investigational Device  
40 Exemption.



STANDARD PROTOCOL ITEMS: RECOMMENDATIONS FOR INTERVENTIONAL TRIALS

SPIRIT 2013 Checklist: Recommended items to address in a clinical trial protocol and related documents\*

| Section/item                      | Item No | Description                                                                                                                                                                                                                                                                              | Location in Manuscript               |
|-----------------------------------|---------|------------------------------------------------------------------------------------------------------------------------------------------------------------------------------------------------------------------------------------------------------------------------------------------|--------------------------------------|
| <b>Administrative information</b> |         |                                                                                                                                                                                                                                                                                          |                                      |
| Title                             | 1       | Descriptive title identifying the study design, population, interventions, and, if applicable, trial acronym                                                                                                                                                                             | Page 1 Line 1-2                      |
| Trial registration                | 2a      | Trial identifier and registry name. If not yet registered, name of intended registry                                                                                                                                                                                                     | Page 2 Line 27                       |
|                                   | 2b      | All items from the World Health Organization Trial Registration Data Set                                                                                                                                                                                                                 | Page 1, 4, 5, 6, 8 (Table 1)         |
| Protocol version                  | 3       | Date and version identifier                                                                                                                                                                                                                                                              | Page 1 Line 37-38                    |
| Funding                           | 4       | Sources and types of financial, material, and other support                                                                                                                                                                                                                              | Page 10 Line 31-33                   |
| Roles and responsibilities        | 5a      | Names, affiliations, and roles of protocol contributors                                                                                                                                                                                                                                  | Page 1 Line 4-12, Page 10 Line 26-28 |
|                                   | 5b      | Name and contact information for the trial sponsor                                                                                                                                                                                                                                       | N/A                                  |
|                                   | 5c      | Role of study sponsor and funders, if any, in study design; collection, management, analysis, and interpretation of data; writing of the report; and the decision to submit the report for publication, including whether they will have ultimate authority over any of these activities | Page 10 Line 33-35                   |
|                                   | 5d      | Composition, roles, and responsibilities of the coordinating centre, steering committee, endpoint adjudication committee, data management team, and other individuals or groups overseeing the trial, if applicable (see Item 21a for data monitoring committee)                         | N/A                                  |

**Introduction**

|    |                                                           |     |                                                       |                 |
|----|-----------------------------------------------------------|-----|-------------------------------------------------------|-----------------|
| 1  |                                                           |     |                                                       |                 |
| 2  | Background and                                            | 6a  | Description of research question and justification    | Page 3          |
| 3  | rationale                                                 |     | for undertaking the trial, including summary of       |                 |
| 4  |                                                           |     | relevant studies (published and unpublished)          |                 |
| 5  |                                                           |     | examining benefits and harms for each                 |                 |
| 6  |                                                           |     | intervention                                          |                 |
| 7  |                                                           |     |                                                       |                 |
| 8  |                                                           | 6b  | Explanation for choice of comparators                 | Page 3, 4       |
| 9  |                                                           |     |                                                       |                 |
| 10 | Objectives                                                | 7   | Specific objectives or hypotheses                     | Page 6, 7       |
| 11 |                                                           |     |                                                       |                 |
| 12 | Trial design                                              | 8   | Description of trial design including type of trial   | Page 4 Line 20  |
| 13 |                                                           |     | (eg, parallel group, crossover, factorial, single     |                 |
| 14 |                                                           |     | group), allocation ratio, and framework (eg,          |                 |
| 15 |                                                           |     | superiority, equivalence, noninferiority,             |                 |
| 16 |                                                           |     | exploratory)                                          |                 |
| 17 |                                                           |     |                                                       |                 |
| 18 |                                                           |     |                                                       |                 |
| 19 |                                                           |     |                                                       |                 |
| 20 | <b>Methods: Participants, interventions, and outcomes</b> |     |                                                       |                 |
| 21 |                                                           |     |                                                       |                 |
| 22 | Study setting                                             | 9   | Description of study settings (eg, community          | Page 4 Line 23- |
| 23 |                                                           |     | clinic, academic hospital) and list of countries      | 25              |
| 24 |                                                           |     | where data will be collected. Reference to where      |                 |
| 25 |                                                           |     | list of study sites can be obtained                   |                 |
| 26 |                                                           |     |                                                       |                 |
| 27 | Eligibility criteria                                      | 10  | Inclusion and exclusion criteria for participants. If | Page 5 Line 8-  |
| 28 |                                                           |     | applicable, eligibility criteria for study centres    | 19, Page 8      |
| 29 |                                                           |     | and individuals who will perform the                  | (Table 1)       |
| 30 |                                                           |     | interventions (eg, surgeons, psychotherapists)        |                 |
| 31 |                                                           |     |                                                       |                 |
| 32 |                                                           |     |                                                       |                 |
| 33 | Interventions                                             | 11a | Interventions for each group with sufficient detail   | Page 5, 6       |
| 34 |                                                           |     | to allow replication, including how and when they     |                 |
| 35 |                                                           |     | will be administered                                  |                 |
| 36 |                                                           |     |                                                       |                 |
| 37 |                                                           | 11b | Criteria for discontinuing or modifying allocated     | Page 6 Line 17- |
| 38 |                                                           |     | interventions for a given trial participant (eg,      | 23              |
| 39 |                                                           |     | drug dose change in response to harms,                |                 |
| 40 |                                                           |     | participant request, or improving/worsening           |                 |
| 41 |                                                           |     | disease)                                              |                 |
| 42 |                                                           |     |                                                       |                 |
| 43 |                                                           |     |                                                       |                 |
| 44 |                                                           | 11c | Strategies to improve adherence to intervention       | Page 5 Line 4-5 |
| 45 |                                                           |     | protocols, and any procedures for monitoring          |                 |
| 46 |                                                           |     | adherence (eg, drug tablet return, laboratory         |                 |
| 47 |                                                           |     | tests)                                                |                 |
| 48 |                                                           |     |                                                       |                 |
| 49 |                                                           |     |                                                       |                 |
| 50 |                                                           | 11d | Relevant concomitant care and interventions           | Page 4, 5       |
| 51 |                                                           |     | that are permitted or prohibited during the trial     |                 |
| 52 |                                                           |     |                                                       |                 |
| 53 |                                                           |     |                                                       |                 |
| 54 |                                                           |     |                                                       |                 |
| 55 |                                                           |     |                                                       |                 |
| 56 |                                                           |     |                                                       |                 |
| 57 |                                                           |     |                                                       |                 |
| 58 |                                                           |     |                                                       |                 |
| 59 |                                                           |     |                                                       |                 |
| 60 |                                                           |     |                                                       |                 |

|    |                      |    |                                                                                                                                                                                                                                                                                                                                                                                |                   |
|----|----------------------|----|--------------------------------------------------------------------------------------------------------------------------------------------------------------------------------------------------------------------------------------------------------------------------------------------------------------------------------------------------------------------------------|-------------------|
| 1  |                      |    |                                                                                                                                                                                                                                                                                                                                                                                |                   |
| 2  | Outcomes             | 12 | Primary, secondary, and other outcomes, including the specific measurement variable (eg, systolic blood pressure), analysis metric (eg, change from baseline, final value, time to event), method of aggregation (eg, median, proportion), and time point for each outcome. Explanation of the clinical relevance of chosen efficacy and harm outcomes is strongly recommended | Page 6, 7         |
| 3  |                      |    |                                                                                                                                                                                                                                                                                                                                                                                |                   |
| 4  |                      |    |                                                                                                                                                                                                                                                                                                                                                                                |                   |
| 5  |                      |    |                                                                                                                                                                                                                                                                                                                                                                                |                   |
| 6  |                      |    |                                                                                                                                                                                                                                                                                                                                                                                |                   |
| 7  |                      |    |                                                                                                                                                                                                                                                                                                                                                                                |                   |
| 8  |                      |    |                                                                                                                                                                                                                                                                                                                                                                                |                   |
| 9  |                      |    |                                                                                                                                                                                                                                                                                                                                                                                |                   |
| 10 |                      |    |                                                                                                                                                                                                                                                                                                                                                                                |                   |
| 11 |                      |    |                                                                                                                                                                                                                                                                                                                                                                                |                   |
| 12 | Participant timeline | 13 | Time schedule of enrolment, interventions (including any run-ins and washouts), assessments, and visits for participants. A schematic diagram is highly recommended (see Figure)                                                                                                                                                                                               | Page 5, 6         |
| 13 |                      |    |                                                                                                                                                                                                                                                                                                                                                                                |                   |
| 14 |                      |    |                                                                                                                                                                                                                                                                                                                                                                                |                   |
| 15 |                      |    |                                                                                                                                                                                                                                                                                                                                                                                |                   |
| 16 |                      |    |                                                                                                                                                                                                                                                                                                                                                                                |                   |
| 17 |                      |    |                                                                                                                                                                                                                                                                                                                                                                                |                   |
| 18 |                      |    |                                                                                                                                                                                                                                                                                                                                                                                |                   |
| 19 | Sample size          | 14 | Estimated number of participants needed to achieve study objectives and how it was determined, including clinical and statistical assumptions supporting any sample size calculations                                                                                                                                                                                          | Page 5 Line 22-25 |
| 20 |                      |    |                                                                                                                                                                                                                                                                                                                                                                                |                   |
| 21 |                      |    |                                                                                                                                                                                                                                                                                                                                                                                |                   |
| 22 |                      |    |                                                                                                                                                                                                                                                                                                                                                                                |                   |
| 23 |                      |    |                                                                                                                                                                                                                                                                                                                                                                                |                   |
| 24 |                      |    |                                                                                                                                                                                                                                                                                                                                                                                |                   |
| 25 |                      |    |                                                                                                                                                                                                                                                                                                                                                                                |                   |
| 26 | Recruitment          | 15 | Strategies for achieving adequate participant enrolment to reach target sample size                                                                                                                                                                                                                                                                                            | Page 5 Line 8-19  |
| 27 |                      |    |                                                                                                                                                                                                                                                                                                                                                                                |                   |
| 28 |                      |    |                                                                                                                                                                                                                                                                                                                                                                                |                   |

### Methods: Assignment of interventions (for controlled trials)

#### Allocation:

|    |                                  |     |                                                                                                                                                                                                                                                                                                                                                          |     |
|----|----------------------------------|-----|----------------------------------------------------------------------------------------------------------------------------------------------------------------------------------------------------------------------------------------------------------------------------------------------------------------------------------------------------------|-----|
| 31 |                                  |     |                                                                                                                                                                                                                                                                                                                                                          |     |
| 32 |                                  |     |                                                                                                                                                                                                                                                                                                                                                          |     |
| 33 | Sequence generation              | 16a | Method of generating the allocation sequence (eg, computer-generated random numbers), and list of any factors for stratification. To reduce predictability of a random sequence, details of any planned restriction (eg, blocking) should be provided in a separate document that is unavailable to those who enrol participants or assign interventions | N/A |
| 34 |                                  |     |                                                                                                                                                                                                                                                                                                                                                          |     |
| 35 |                                  |     |                                                                                                                                                                                                                                                                                                                                                          |     |
| 36 |                                  |     |                                                                                                                                                                                                                                                                                                                                                          |     |
| 37 |                                  |     |                                                                                                                                                                                                                                                                                                                                                          |     |
| 38 |                                  |     |                                                                                                                                                                                                                                                                                                                                                          |     |
| 39 |                                  |     |                                                                                                                                                                                                                                                                                                                                                          |     |
| 40 |                                  |     |                                                                                                                                                                                                                                                                                                                                                          |     |
| 41 |                                  |     |                                                                                                                                                                                                                                                                                                                                                          |     |
| 42 |                                  |     |                                                                                                                                                                                                                                                                                                                                                          |     |
| 43 |                                  |     |                                                                                                                                                                                                                                                                                                                                                          |     |
| 44 | Allocation concealment mechanism | 16b | Mechanism of implementing the allocation sequence (eg, central telephone; sequentially numbered, opaque, sealed envelopes), describing any steps to conceal the sequence until interventions are assigned                                                                                                                                                | N/A |
| 45 |                                  |     |                                                                                                                                                                                                                                                                                                                                                          |     |
| 46 |                                  |     |                                                                                                                                                                                                                                                                                                                                                          |     |
| 47 |                                  |     |                                                                                                                                                                                                                                                                                                                                                          |     |
| 48 |                                  |     |                                                                                                                                                                                                                                                                                                                                                          |     |
| 49 |                                  |     |                                                                                                                                                                                                                                                                                                                                                          |     |
| 50 |                                  |     |                                                                                                                                                                                                                                                                                                                                                          |     |
| 51 | Implementation                   | 16c | Who will generate the allocation sequence, who will enrol participants, and who will assign participants to interventions                                                                                                                                                                                                                                | N/A |
| 52 |                                  |     |                                                                                                                                                                                                                                                                                                                                                          |     |
| 53 |                                  |     |                                                                                                                                                                                                                                                                                                                                                          |     |
| 54 |                                  |     |                                                                                                                                                                                                                                                                                                                                                          |     |
| 55 | Blinding (masking)               | 17a | Who will be blinded after assignment to interventions (eg, trial participants, care providers, outcome assessors, data analysts), and how                                                                                                                                                                                                                | N/A |
| 56 |                                  |     |                                                                                                                                                                                                                                                                                                                                                          |     |
| 57 |                                  |     |                                                                                                                                                                                                                                                                                                                                                          |     |
| 58 |                                  |     |                                                                                                                                                                                                                                                                                                                                                          |     |
| 59 |                                  |     |                                                                                                                                                                                                                                                                                                                                                          |     |
| 60 |                                  |     |                                                                                                                                                                                                                                                                                                                                                          |     |

- 1  
2 17b If blinded, circumstances under which unblinding N/A  
3 is permissible, and procedure for revealing a  
4 participant's allocated intervention during the  
5 trial  
6

7  
8 **Methods: Data collection, management, and analysis**

- 9  
10 Data collection 18a Plans for assessment and collection of outcome, Page 6 Line 26-  
11 methods including any baseline, and other trial data, including any 34  
12 related processes to promote data quality (eg,  
13 duplicate measurements, training of assessors)  
14 and a description of study instruments (eg,  
15 questionnaires, laboratory tests) along with their  
16 reliability and validity, if known. Reference to  
17 where data collection forms can be found, if not  
18 in the protocol  
19  
20  
21 18b Plans to promote participant retention and Page 5 Line 4-5  
22 complete follow-up, including list of any outcome  
23 data to be collected for participants who  
24 discontinue or deviate from intervention  
25 protocols  
26  
27  
28 Data 19 Plans for data entry, coding, security, and Page 6 Line 26-  
29 management storage, including any related processes to 34  
30 promote data quality (eg, double data entry;  
31 range checks for data values). Reference to  
32 where details of data management procedures  
33 can be found, if not in the protocol  
34  
35  
36 Statistical 20a Statistical methods for analysing primary and Page 7 Line 38-  
37 methods secondary outcomes. Reference to where other 46  
38 details of the statistical analysis plan can be  
39 found, if not in the protocol  
40  
41  
42 20b Methods for any additional analyses (eg, Page 7 Line 38-  
43 subgroup and adjusted analyses) 46  
44  
45 20c Definition of analysis population relating to N/A  
46 protocol non-adherence (eg, as randomised  
47 analysis), and any statistical methods to handle  
48 missing data (eg, multiple imputation)  
49  
50

51 **Methods: Monitoring**  
52  
53  
54  
55  
56  
57  
58  
59  
60

|    |                                 |     |                                                                                                                                                                                                                                                                                                                                       |
|----|---------------------------------|-----|---------------------------------------------------------------------------------------------------------------------------------------------------------------------------------------------------------------------------------------------------------------------------------------------------------------------------------------|
| 1  |                                 |     |                                                                                                                                                                                                                                                                                                                                       |
| 2  | Data monitoring                 | 21a | Composition of data monitoring committee (DMC); summary of its role and reporting structure; statement of whether it is independent from the sponsor and competing interests; and reference to where further details about its charter can be found, if not in the protocol. Alternatively, an explanation of why a DMC is not needed |
| 3  |                                 |     | Page 6 Line 26-34                                                                                                                                                                                                                                                                                                                     |
| 4  |                                 |     |                                                                                                                                                                                                                                                                                                                                       |
| 5  |                                 |     |                                                                                                                                                                                                                                                                                                                                       |
| 6  |                                 |     |                                                                                                                                                                                                                                                                                                                                       |
| 7  |                                 |     |                                                                                                                                                                                                                                                                                                                                       |
| 8  |                                 |     |                                                                                                                                                                                                                                                                                                                                       |
| 9  |                                 |     |                                                                                                                                                                                                                                                                                                                                       |
| 10 |                                 |     |                                                                                                                                                                                                                                                                                                                                       |
| 11 |                                 |     |                                                                                                                                                                                                                                                                                                                                       |
| 12 |                                 | 21b | Description of any interim analyses and stopping guidelines, including who will have access to these interim results and make the final decision to terminate the trial                                                                                                                                                               |
| 13 |                                 |     | Page 6 Line 17-23                                                                                                                                                                                                                                                                                                                     |
| 14 |                                 |     |                                                                                                                                                                                                                                                                                                                                       |
| 15 |                                 |     |                                                                                                                                                                                                                                                                                                                                       |
| 16 |                                 |     |                                                                                                                                                                                                                                                                                                                                       |
| 17 |                                 |     |                                                                                                                                                                                                                                                                                                                                       |
| 18 | Harms                           | 22  | Plans for collecting, assessing, reporting, and managing solicited and spontaneously reported adverse events and other unintended effects of trial interventions or trial conduct                                                                                                                                                     |
| 19 |                                 |     | Page 6 Line 17-23, Page 7 Line 24-35                                                                                                                                                                                                                                                                                                  |
| 20 |                                 |     |                                                                                                                                                                                                                                                                                                                                       |
| 21 |                                 |     |                                                                                                                                                                                                                                                                                                                                       |
| 22 |                                 |     |                                                                                                                                                                                                                                                                                                                                       |
| 23 |                                 |     |                                                                                                                                                                                                                                                                                                                                       |
| 24 | Auditing                        | 23  | Frequency and procedures for auditing trial conduct, if any, and whether the process will be independent from investigators and the sponsor                                                                                                                                                                                           |
| 25 |                                 |     | N/A                                                                                                                                                                                                                                                                                                                                   |
| 26 |                                 |     |                                                                                                                                                                                                                                                                                                                                       |
| 27 |                                 |     |                                                                                                                                                                                                                                                                                                                                       |
| 28 |                                 |     |                                                                                                                                                                                                                                                                                                                                       |
| 29 | <b>Ethics and dissemination</b> |     |                                                                                                                                                                                                                                                                                                                                       |
| 30 |                                 |     |                                                                                                                                                                                                                                                                                                                                       |
| 31 | Research ethics approval        | 24  | Plans for seeking research ethics committee/institutional review board (REC/IRB) approval                                                                                                                                                                                                                                             |
| 32 |                                 |     | Page 8 Line 10-15                                                                                                                                                                                                                                                                                                                     |
| 33 |                                 |     |                                                                                                                                                                                                                                                                                                                                       |
| 34 |                                 |     |                                                                                                                                                                                                                                                                                                                                       |
| 35 | Protocol amendments             | 25  | Plans for communicating important protocol modifications (eg, changes to eligibility criteria, outcomes, analyses) to relevant parties (eg, investigators, REC/IRBs, trial participants, trial registries, journals, regulators)                                                                                                      |
| 36 |                                 |     | Page 8 Line 10-15                                                                                                                                                                                                                                                                                                                     |
| 37 |                                 |     |                                                                                                                                                                                                                                                                                                                                       |
| 38 |                                 |     |                                                                                                                                                                                                                                                                                                                                       |
| 39 |                                 |     |                                                                                                                                                                                                                                                                                                                                       |
| 40 |                                 |     |                                                                                                                                                                                                                                                                                                                                       |
| 41 |                                 |     |                                                                                                                                                                                                                                                                                                                                       |
| 42 | Consent or assent               | 26a | Who will obtain informed consent or assent from potential trial participants or authorised surrogates, and how (see Item 32)                                                                                                                                                                                                          |
| 43 |                                 |     | Page 5 Line 18-19                                                                                                                                                                                                                                                                                                                     |
| 44 |                                 |     |                                                                                                                                                                                                                                                                                                                                       |
| 45 |                                 |     |                                                                                                                                                                                                                                                                                                                                       |
| 46 |                                 | 26b | Additional consent provisions for collection and use of participant data and biological specimens in ancillary studies, if applicable                                                                                                                                                                                                 |
| 47 |                                 |     | N/A                                                                                                                                                                                                                                                                                                                                   |
| 48 |                                 |     |                                                                                                                                                                                                                                                                                                                                       |
| 49 |                                 |     |                                                                                                                                                                                                                                                                                                                                       |
| 50 |                                 |     |                                                                                                                                                                                                                                                                                                                                       |
| 51 | Confidentiality                 | 27  | How personal information about potential and enrolled participants will be collected, shared, and maintained in order to protect confidentiality before, during, and after the trial                                                                                                                                                  |
| 52 |                                 |     | Page 6 Line 311-33                                                                                                                                                                                                                                                                                                                    |
| 53 |                                 |     |                                                                                                                                                                                                                                                                                                                                       |
| 54 |                                 |     |                                                                                                                                                                                                                                                                                                                                       |
| 55 |                                 |     |                                                                                                                                                                                                                                                                                                                                       |
| 56 |                                 |     |                                                                                                                                                                                                                                                                                                                                       |
| 57 | Declaration of interests        | 28  | Financial and other competing interests for principal investigators for the overall trial and each study site                                                                                                                                                                                                                         |
| 58 |                                 |     | Page 10 Line 38                                                                                                                                                                                                                                                                                                                       |
| 59 |                                 |     |                                                                                                                                                                                                                                                                                                                                       |
| 60 |                                 |     |                                                                                                                                                                                                                                                                                                                                       |



|    |                               |     |                                                                                                                                                                                                                                                                                     |                                      |
|----|-------------------------------|-----|-------------------------------------------------------------------------------------------------------------------------------------------------------------------------------------------------------------------------------------------------------------------------------------|--------------------------------------|
| 1  |                               |     |                                                                                                                                                                                                                                                                                     |                                      |
| 2  | Access to data                | 29  | Statement of who will have access to the final trial dataset, and disclosure of contractual agreements that limit such access for investigators                                                                                                                                     | Page 6 Line 26-34, Page 8 Line 16-19 |
| 3  |                               |     |                                                                                                                                                                                                                                                                                     |                                      |
| 4  |                               |     |                                                                                                                                                                                                                                                                                     |                                      |
| 5  |                               |     |                                                                                                                                                                                                                                                                                     |                                      |
| 6  |                               |     |                                                                                                                                                                                                                                                                                     |                                      |
| 7  | Ancillary and post-trial care | 30  | Provisions, if any, for ancillary and post-trial care, and for compensation to those who suffer harm from trial participation                                                                                                                                                       | N/A                                  |
| 8  |                               |     |                                                                                                                                                                                                                                                                                     |                                      |
| 9  |                               |     |                                                                                                                                                                                                                                                                                     |                                      |
| 10 |                               |     |                                                                                                                                                                                                                                                                                     |                                      |
| 11 |                               |     |                                                                                                                                                                                                                                                                                     |                                      |
| 12 | Dissemination policy          | 31a | Plans for investigators and sponsor to communicate trial results to participants, healthcare professionals, the public, and other relevant groups (eg, via publication, reporting in results databases, or other data sharing arrangements), including any publication restrictions | Page 8 Line 16-19                    |
| 13 |                               |     |                                                                                                                                                                                                                                                                                     |                                      |
| 14 |                               |     |                                                                                                                                                                                                                                                                                     |                                      |
| 15 |                               |     |                                                                                                                                                                                                                                                                                     |                                      |
| 16 |                               |     |                                                                                                                                                                                                                                                                                     |                                      |
| 17 |                               |     |                                                                                                                                                                                                                                                                                     |                                      |
| 18 |                               |     |                                                                                                                                                                                                                                                                                     |                                      |
| 19 |                               |     |                                                                                                                                                                                                                                                                                     |                                      |
| 20 |                               |     |                                                                                                                                                                                                                                                                                     |                                      |
| 21 |                               | 31b | Authorship eligibility guidelines and any intended use of professional writers                                                                                                                                                                                                      | Page 8 Line 16-19                    |
| 22 |                               |     |                                                                                                                                                                                                                                                                                     |                                      |
| 23 |                               |     |                                                                                                                                                                                                                                                                                     |                                      |
| 24 |                               |     |                                                                                                                                                                                                                                                                                     |                                      |
| 25 |                               | 31c | Plans, if any, for granting public access to the full protocol, participant-level dataset, and statistical code                                                                                                                                                                     | Page 8 Line 16-19                    |
| 26 |                               |     |                                                                                                                                                                                                                                                                                     |                                      |
| 27 |                               |     |                                                                                                                                                                                                                                                                                     |                                      |
| 28 |                               |     |                                                                                                                                                                                                                                                                                     |                                      |
| 29 |                               |     |                                                                                                                                                                                                                                                                                     |                                      |
| 30 | <b>Appendices</b>             |     |                                                                                                                                                                                                                                                                                     |                                      |
| 31 | Informed consent materials    | 32  | Model consent form and other related documentation given to participants and authorised surrogates                                                                                                                                                                                  | Attached supplementary file          |
| 32 |                               |     |                                                                                                                                                                                                                                                                                     |                                      |
| 33 |                               |     |                                                                                                                                                                                                                                                                                     |                                      |
| 34 |                               |     |                                                                                                                                                                                                                                                                                     |                                      |
| 35 |                               |     |                                                                                                                                                                                                                                                                                     |                                      |
| 36 | Biological specimens          | 33  | Plans for collection, laboratory evaluation, and storage of biological specimens for genetic or molecular analysis in the current trial and for future use in ancillary studies, if applicable                                                                                      | N/A                                  |
| 37 |                               |     |                                                                                                                                                                                                                                                                                     |                                      |
| 38 |                               |     |                                                                                                                                                                                                                                                                                     |                                      |
| 39 |                               |     |                                                                                                                                                                                                                                                                                     |                                      |
| 40 |                               |     |                                                                                                                                                                                                                                                                                     |                                      |

\*It is strongly recommended that this checklist be read in conjunction with the SPIRIT 2013 Explanation & Elaboration for important clarification on the items. Amendments to the protocol should be tracked and dated. The SPIRIT checklist is copyrighted by the SPIRIT Group under the Creative Commons "[Attribution-NonCommercial-NoDerivs 3.0 Unported](https://creativecommons.org/licenses/by-nc-nd/3.0/)" license.
